# Supplementary material
Source: PubMed Central journal article supplement (PMC3458130)
Supplement: NIHMS384343-supplement-Supp_Table_S1-S4.pdf [file NIHMS384343-supplement-Supp_Table_S1-S4.pdf]

Table S1. Clinical Characteristics of the patients with ICC, CHC and HCC

| Variable                         | ICC <sup>a</sup> |       |         | HCC <sup>b</sup>           |                                  |                                  |             | P value <sup>c</sup> |                   |
|----------------------------------|------------------|-------|---------|----------------------------|----------------------------------|----------------------------------|-------------|----------------------|-------------------|
|                                  | ICC              | CHC   | ICC+CHC | Age and Gender matched HCC | Age and Gender matched HCC set A | Age and Gender matched HCC set B | Extreme HCC | ICC vs HCC           | ICC+CHC vs HCC    |
| Number                           | 16               | 7     | 23      | 46                         | 23                               | 23                               | 61          |                      |                   |
| <b>Gender</b>                    |                  |       |         |                            |                                  |                                  |             |                      |                   |
| Male/Female                      | 11/5             | 7/0   | 18/5    | 36/10                      | 18/5                             | 18/5                             | 57/4        | 0.5049               | 1                 |
| <b>Age-yr</b>                    |                  |       |         |                            |                                  |                                  |             |                      |                   |
| Median                           | 59.5             | 59    |         | 59.5                       | 59.5                             | 59.0                             | 50          |                      |                   |
| Mean                             | 56.4             | 57    |         | 57.1                       | 57.3                             | 56.7                             | 50.1        |                      |                   |
| Range                            | 35-73            | 42-65 | 35-73   | 35-73                      | 39-72                            | 35-73                            | 25-72       |                      |                   |
| SD                               | 12.138           | 7.767 |         | 10.117                     | 9.612                            | 10.808                           | 10.175      | 0.9294               | 0.9691            |
| <b>Hepatitis Virus Infection</b> |                  |       |         |                            |                                  |                                  |             |                      |                   |
| HBs-Ag (Pos/Neg)                 | 4/12             | 2/5   | 6/17    | 39/7                       | 18/5                             | 21/2                             | 57/4        | <b>0.0001</b>        | <b>&lt;0.0001</b> |
| HCV-Ab (Pos/Neg)                 | 1/15             | 1/6   | 2/21    | 1/45                       | 1/22                             | 0/23                             | 0/61        | 0.4527               | 0.2559            |
| no infection (Yes/No)            | 11/5             | 4/3   | 15/8    | 6/40                       | 4/19                             | 2/21                             | 4/57        | <b>&lt;0.0001</b>    | <b>&lt;0.0001</b> |
| <b>Liver Chirrhosis</b>          |                  |       |         |                            |                                  |                                  |             |                      |                   |
| Yes/No                           | 4/12             | 2/5   | 6/17    | 41/5                       | 20/3                             | 21/2                             | 60/1        | <b>&lt;0.0001</b>    | <b>&lt;0.0001</b> |
| <b>TNM stage</b>                 |                  |       |         |                            |                                  |                                  |             |                      |                   |
| I, II/III, IV                    | 12/4             | 5/2   | 17/6    | 40/6                       | 18/5                             | 22/1                             | 45/16       | 0.5769               | 0.1727            |
| <b>Blood Chemistry Test</b>      |                  |       |         |                            |                                  |                                  |             |                      |                   |
| AFP (>300/<300)                  | 0/14             | 2/5   | 2/19    | 22/24                      | 9/14                             | 13/10                            | 30/31       | <b>0.0019</b>        | <b>0.0024</b>     |
| CEA (>5/<5)                      | 6/8              | 1/6   | 7/14    | 11/35                      | 4/19                             | 7/16                             | 6/49        | 0.3136               | 0.5622            |
| CA19-9 (>100/<100)               | 6/8              | 1/6   | 7/14    | 3/43                       | 1/22                             | 2/21                             | 4/49        | <b>0.0096</b>        | <b>0.0308</b>     |

<sup>a</sup>The clinical characteristics of the 23 patients in the ICC cohort derived from the Liver Cancer Institute and the Kanazawa University. Among them, 16 were classified as typical ICC and 7 as CHC.

<sup>b</sup>The clinical characteristics of the 107 patients in the HCC cohort derived from the Liver Cancer Institute. Two randomly selected groups, each consisting of 23 age and gender matched HCC cases were selected from a total of 246 cases with publically available gene expression data (GSE14520 and GSE6857). Among 246 cases, 61 cases were identified as extreme cases as defined by those with top quartile EpCAM expression in HCC tissues and with >1000 ng/ml of serum AFP levels vs. those with bottom quartile EpCAM expression and with <20 ng/ml of serum AFP levels.

<sup>c</sup>A value of less than 0.05 was considered to indicate statistical significance. P values were calculated with the use of Fisher's exact test, except for age, which was calculated with the unpaired t-test; TNM, which was calculated with the chi-square test

Table S2. List of 636 ICC-specific Genes<sup>a</sup>

| Gene id     | Gene symbol | Parametric p-value | FDR <sup>b</sup> | Geom mean of intensities in ICC/HpSC-like | Geom mean of intensities in ICC/MH-like | Fold-change (ICC/HpSC-like vs ICC/MH-like) |
|-------------|-------------|--------------------|------------------|-------------------------------------------|-----------------------------------------|--------------------------------------------|
| 205753_at   | CRP         | 0.0011463          | 0.0982           | 1701.75                                   | 217.8                                   | 7.81                                       |
| 206350_at   | APCS        | 0.0004867          | 0.0823           | 664.34                                    | 95.05                                   | 6.99                                       |
| 209937_at   | TM4SF4      | 0.0005474          | 0.0823           | 1817.16                                   | 363.41                                  | 5                                          |
| 205380_at   | PDZK1       | 0.0020936          | 0.12             | 239.28                                    | 50.03                                   | 4.78                                       |
| 209283_at   | CRYAB       | 0.0083636          | 0.187            | 257.54                                    | 54.97                                   | 4.69                                       |
| 219064_at   | ITIH5       | 0.0007861          | 0.0867           | 460.63                                    | 98.93                                   | 4.66                                       |
| 207401_at   | PROX1       | 0.004223           | 0.146            | 314.54                                    | 67.9                                    | 4.63                                       |
| 220502_s_at | SLC13A1     | 0.0029373          | 0.131            | 20.18                                     | 4.54                                    | 4.45                                       |
| 204041_at   | MAOB        | 0.0028722          | 0.131            | 266.96                                    | 62.87                                   | 4.25                                       |
| 219304_s_at | PDGFD       | 0.0069775          | 0.174            | 194.6                                     | 48.7                                    | 4                                          |
| 220831_at   | GCNT4       | 0.0104722          | 0.199            | 98.13                                     | 25.26                                   | 3.88                                       |
| 210382_at   | SCTR        | 0.0035983          | 0.141            | 140.65                                    | 36.36                                   | 3.87                                       |
| 202834_at   | AGT         | 0.0040568          | 0.146            | 313.66                                    | 84.35                                   | 3.72                                       |
| 210085_s_at | ANXA9       | 0.0076403          | 0.18             | 213.42                                    | 61.18                                   | 3.49                                       |
| 219195_at   | PPARGC1A    | 0.0069584          | 0.174            | 155.34                                    | 47.58                                   | 3.26                                       |
| 206325_at   | SERPINA6    | 0.0081236          | 0.184            | 136.35                                    | 42.52                                   | 3.21                                       |
| 209908_s_at | TGFB2       | 0.0028427          | 0.131            | 288.26                                    | 94.34                                   | 3.06                                       |
| 206010_at   | HABP2       | 0.0101232          | 0.196            | 310.58                                    | 102.39                                  | 3.03                                       |
| 213325_at   | PVRL3       | 0.0014831          | 0.107            | 150.15                                    | 50.14                                   | 2.99                                       |
| 209645_s_at | ALDH1B1     | 0.003234           | 0.137            | 155.37                                    | 53.83                                   | 2.89                                       |
| 207749_s_at | PPP2R3A     | 0.0008925          | 0.0867           | 53.27                                     | 18.92                                   | 2.82                                       |
| 205674_x_at | FXD2        | 0.006458           | 0.171            | 122.63                                    | 48.11                                   | 2.55                                       |
| 219225_at   | PGBD5       | 0.0068683          | 0.174            | 34.53                                     | 13.76                                   | 2.51                                       |
| 212921_at   | SMYD2       | 5.54E-05           | 0.0634           | 139.73                                    | 55.87                                   | 2.5                                        |
| 203196_at   | ABCC4       | 0.0068664          | 0.174            | 131.73                                    | 53.93                                   | 2.44                                       |
| 205890_s_at | EST         | 0.0019779          | 0.117            | 784.04                                    | 324.06                                  | 2.42                                       |
| 218350_s_at | GMNN        | 0.0086913          | 0.188            | 118.32                                    | 49.09                                   | 2.41                                       |
| 205313_at   | HNF1B       | 0.0101514          | 0.196            | 280.84                                    | 122.61                                  | 2.29                                       |
| 207709_at   | PRKAA2      | 0.0027784          | 0.131            | 95.48                                     | 41.89                                   | 2.28                                       |
| 202651_at   | LPGAT1      | 0.0008307          | 0.0867           | 185.93                                    | 82                                      | 2.27                                       |
| 201951_at   | ALCAM       | 0.0067704          | 0.174            | 206.4                                     | 90.78                                   | 2.27                                       |
| 206928_at   | ZNF124      | 0.0101673          | 0.196            | 103.88                                    | 46                                      | 2.26                                       |
| 218440_at   | MCCC1       | 0.0016123          | 0.111            | 178.7                                     | 80.74                                   | 2.21                                       |
| 208813_at   | GOT1        | 0.0006842          | 0.0825           | 176.76                                    | 80.99                                   | 2.18                                       |
| 210745_at   | ONECUT1     | 0.0025933          | 0.129            | 288.57                                    | 133.86                                  | 2.16                                       |
| 221412_at   | VN1R1       | 0.0006099          | 0.0823           | 20.51                                     | 9.56                                    | 2.14                                       |
| 221740_x_at | LRRC37A2    | 0.0101416          | 0.196            | 115.78                                    | 54.05                                   | 2.14                                       |
| 201397_at   | PHGDH       | 0.006573           | 0.172            | 121.33                                    | 56.83                                   | 2.13                                       |
| 218237_s_at | SLC38A1     | 0.007394           | 0.178            | 437.38                                    | 206.59                                  | 2.12                                       |
| 202613_at   | CTPS        | 0.0005191          | 0.0823           | 156.23                                    | 74.35                                   | 2.1                                        |
| 201522_x_at | EST         | 0.0085819          | 0.187            | 62.43                                     | 29.82                                   | 2.09                                       |
| 201795_at   | LBR         | 0.0014941          | 0.107            | 434.75                                    | 209.08                                  | 2.08                                       |
| 220220_at   | LRRC37A4    | 0.0031619          | 0.136            | 158.57                                    | 76.38                                   | 2.08                                       |
| 203910_at   | ARHGAP29    | 0.0067418          | 0.174            | 168.79                                    | 81.05                                   | 2.08                                       |
| 206346_at   | PRLR        | 0.0068666          | 0.174            | 22.83                                     | 10.99                                   | 2.08                                       |
| 220483_s_at | RNF19A      | 0.0046708          | 0.152            | 527.02                                    | 255.89                                  | 2.06                                       |
| 202950_at   | CRYZ        | 0.0014223          | 0.105            | 318.18                                    | 156.77                                  | 2.03                                       |
| 203860_at   | PCCA        | 0.0016311          | 0.111            | 66.38                                     | 32.71                                   | 2.03                                       |

|             |           |           |        |        |         |      |
|-------------|-----------|-----------|--------|--------|---------|------|
| 202783_at   | NNT       | 0.0029783 | 0.132  | 375.64 | 185.71  | 2.02 |
| 205383_s_at | ZBTB20    | 0.0041091 | 0.146  | 195.14 | 96.55   | 2.02 |
| 205994_at   | ELK4      | 0.0015027 | 0.107  | 125.38 | 63.33   | 1.98 |
| 204137_at   | GPR137B   | 0.0005719 | 0.0823 | 205.05 | 104.17  | 1.97 |
| 204125_at   | NDUFAF1   | 0.0005896 | 0.0823 | 52.72  | 26.71   | 1.97 |
| 218138_at   | MKKS      | 0.0037193 | 0.143  | 72.3   | 36.75   | 1.97 |
| 220585_at   | HKDC1     | 0.0047314 | 0.152  | 241.85 | 122.55  | 1.97 |
| 217820_s_at | ENAH      | 0.0045005 | 0.15   | 200.05 | 102.72  | 1.95 |
| 212125_at   | RANGAP1   | 7.60E-06  | 0.0303 | 151.1  | 77.77   | 1.94 |
| 218536_at   | MRS2      | 0.0009022 | 0.0867 | 109.71 | 56.47   | 1.94 |
| 201746_at   | TP53      | 0.0011646 | 0.0986 | 166.45 | 85.7    | 1.94 |
| 206079_at   | CHML      | 0.0004528 | 0.0823 | 69.22  | 36.12   | 1.92 |
| 219976_at   | HOOK1     | 0.0021941 | 0.122  | 62.24  | 32.61   | 1.91 |
| 219255_x_at | IL17RB    | 0.0069297 | 0.174  | 63.98  | 33.92   | 1.89 |
| 203323_at   | CAV2      | 0.0067798 | 0.174  | 211.87 | 112.81  | 1.88 |
| 219820_at   | SLC6A16   | 0.0057095 | 0.163  | 40.71  | 21.76   | 1.87 |
| 203073_at   | COG2      | 1.00E-05  | 0.0303 | 74.27  | 40.02   | 1.86 |
| 217894_at   | KCTD3     | 0.002373  | 0.126  | 296.84 | 161.29  | 1.84 |
| 210887_s_at | EVC       | 0.0091368 | 0.19   | 125.88 | 68.7    | 1.83 |
| 205105_at   | MAN2A1    | 0.0011998 | 0.0988 | 129.76 | 71.11   | 1.82 |
| 222212_s_at | LASS2     | 0.0038112 | 0.143  | 907.1  | 497.89  | 1.82 |
| 205931_s_at | CREB5     | 0.0079344 | 0.182  | 53.54  | 29.49   | 1.82 |
| 221897_at   | TRIM52    | 0.0003326 | 0.0823 | 73.28  | 40.49   | 1.81 |
| 204579_at   | FGFR4     | 0.0051533 | 0.157  | 148.85 | 82.25   | 1.81 |
| 200821_at   | LAMP2     | 0.0079175 | 0.182  | 421.59 | 233.02  | 1.81 |
| 206182_at   | ZNF134    | 0.0003802 | 0.0823 | 51.19  | 28.43   | 1.8  |
| 205670_at   | GAL3ST1   | 0.0034606 | 0.139  | 101.96 | 56.84   | 1.79 |
| 202053_s_at | ALDH3A2   | 0.0102844 | 0.197  | 148.21 | 82.84   | 1.79 |
| 209296_at   | PPM1B     | 0.010445  | 0.199  | 164.08 | 91.59   | 1.79 |
| 204526_s_at | TBC1D8    | 0.0055955 | 0.161  | 213.96 | 120.47  | 1.78 |
| 205217_at   | TIMM8A    | 0.0005525 | 0.0823 | 36.4   | 20.61   | 1.77 |
| 214616_at   | HIST1H3E  | 0.0033178 | 0.137  | 12.3   | 6.94    | 1.77 |
| 218766_s_at | WARS2     | 0.0093669 | 0.191  | 78.74  | 44.36   | 1.77 |
| 207417_s_at | ZNF177    | 0.0011861 | 0.0988 | 25.44  | 14.42   | 1.76 |
| 212164_at   | TMEM183A  | 0.0080889 | 0.184  | 21.95  | 12.5    | 1.76 |
| 213996_at   | YPEL1     | 0.0001468 | 0.0805 | 32.71  | 18.7    | 1.75 |
| 202427_s_at | BRP44     | 0.0020791 | 0.12   | 225.43 | 129.01  | 1.75 |
| 211200_s_at | EFCAB2    | 0.0028313 | 0.131  | 31.76  | 18.15   | 1.75 |
| 205074_at   | SLC22A5   | 0.0039997 | 0.146  | 106.22 | 60.55   | 1.75 |
| 214838_at   | SFT2D2    | 0.0020235 | 0.118  | 265.21 | 152.51  | 1.74 |
| 209875_s_at | SPP1      | 0.0059216 | 0.164  | 2420.5 | 1388.22 | 1.74 |
| 220215_at   | ZNF669    | 0.0005475 | 0.0823 | 41.68  | 24.03   | 1.73 |
| 218890_x_at | MRPL35    | 0.0023614 | 0.126  | 53.88  | 31.12   | 1.73 |
| 204349_at   | MED7      | 0.0039312 | 0.145  | 103.35 | 59.81   | 1.73 |
| 217630_at   | ANGEL2    | 5.98E-05  | 0.0634 | 82.85  | 48.36   | 1.71 |
| 202169_s_at | AASDHPPT  | 0.002888  | 0.131  | 106.55 | 62.24   | 1.71 |
| 218270_at   | MRPL24    | 0.0004216 | 0.0823 | 180.11 | 106.17  | 1.7  |
| 205655_at   | MDM4      | 0.0004621 | 0.0823 | 180.13 | 106.07  | 1.7  |
| 201789_at   | DHRS7     | 0.0004521 | 0.0823 | 119.77 | 70.85   | 1.69 |
| 212460_at   | C14orf147 | 0.0015492 | 0.109  | 45.51  | 26.9    | 1.69 |
| 222267_at   | TMEM209   | 0.0018487 | 0.113  | 101.94 | 60.8    | 1.68 |
| 209694_at   | PTS       | 0.0024775 | 0.127  | 86.93  | 51.66   | 1.68 |
| 204012_s_at | LCMT2     | 0.0029181 | 0.131  | 43.93  | 26.21   | 1.68 |
| 220260_at   | TBC1D19   | 0.0031317 | 0.136  | 49.95  | 29.85   | 1.67 |

|             |           |           |        |        |        |      |
|-------------|-----------|-----------|--------|--------|--------|------|
| 208809_s_at | C6orf62   | 0.0058047 | 0.163  | 238.63 | 142.72 | 1.67 |
| 220020_at   | XPNPEP3   | 0.0051409 | 0.157  | 70.63  | 42.56  | 1.66 |
| 217958_at   | TRAPPC4   | 0.0058354 | 0.163  | 157.16 | 94.53  | 1.66 |
| 220481_at   | GPR75     | 0.0063995 | 0.171  | 49.71  | 29.94  | 1.66 |
| 218605_at   | TFB2M     | 0.0002648 | 0.0823 | 53.08  | 32.24  | 1.65 |
| 220144_s_at | ANKRD5    | 0.0004834 | 0.0823 | 30.93  | 18.77  | 1.65 |
| 218783_at   | INTS7     | 0.0017646 | 0.113  | 93.76  | 56.69  | 1.65 |
| 219325_s_at | ELAC1     | 0.000594  | 0.0823 | 44.93  | 27.33  | 1.64 |
| 203774_at   | MTR       | 0.0014747 | 0.107  | 107.03 | 65.66  | 1.63 |
| 203316_s_at | SNRPE     | 0.0015882 | 0.11   | 52.11  | 31.97  | 1.63 |
| 206225_at   | ZNF507    | 0.0048143 | 0.153  | 100.77 | 61.79  | 1.63 |
| 200793_s_at | ACO2      | 0.0069215 | 0.174  | 232.59 | 143.13 | 1.63 |
| 205689_at   | PCNXL2    | 0.0052173 | 0.158  | 89.31  | 55.47  | 1.61 |
| 204238_s_at | C6orf108  | 0.009388  | 0.191  | 94.71  | 58.71  | 1.61 |
| 221277_s_at | PUS3      | 0.000467  | 0.0823 | 15.21  | 9.5    | 1.6  |
| 218229_s_at | POGK      | 0.0005561 | 0.0823 | 147.54 | 92.3   | 1.6  |
| 201823_s_at | RNF14     | 0.0011171 | 0.0975 | 150.48 | 93.78  | 1.6  |
| 210066_s_at | AQP4      | 0.0072822 | 0.176  | 12.85  | 8.03   | 1.6  |
| 218882_s_at | WDR3      | 0.0088233 | 0.189  | 32.86  | 20.54  | 1.6  |
| 208140_s_at | LRRC48    | 0.0092674 | 0.19   | 25.51  | 15.96  | 1.6  |
| 202004_x_at | SDHC      | 0.0001239 | 0.0805 | 115.58 | 72.85  | 1.59 |
| 222283_at   | ZNF480    | 0.0004215 | 0.0823 | 54.78  | 34.46  | 1.59 |
| 218344_s_at | RCOR3     | 0.000148  | 0.0805 | 163.47 | 103.48 | 1.58 |
| 209805_at   | EST       | 0.0001596 | 0.0805 | 91     | 57.67  | 1.58 |
| 220018_at   | CBLL1     | 0.0004098 | 0.0823 | 64.71  | 40.95  | 1.58 |
| 218594_at   | HEATR1    | 0.0004413 | 0.0823 | 162.07 | 102.55 | 1.58 |
| 201966_at   | NDUFS2    | 0.0008754 | 0.0867 | 263.23 | 167.12 | 1.58 |
| 207618_s_at | BCS1L     | 0.0055896 | 0.161  | 62.83  | 39.71  | 1.58 |
| 212704_at   | ZCCHC11   | 0.0083953 | 0.187  | 124.68 | 78.75  | 1.58 |
| 209455_at   | FBXW11    | 0.0005127 | 0.0823 | 120.18 | 76.31  | 1.57 |
| 219163_at   | ZNF562    | 0.0032452 | 0.137  | 33.4   | 21.3   | 1.57 |
| 212297_at   | ATP13A3   | 0.0048954 | 0.154  | 498.14 | 317.73 | 1.57 |
| 209111_at   | RNF5      | 0.0051328 | 0.157  | 115.23 | 73.38  | 1.57 |
| 204838_s_at | MLH3      | 0.0055445 | 0.161  | 61.56  | 39.1   | 1.57 |
| 200652_at   | SSR2      | 0.000434  | 0.0823 | 831.51 | 533.52 | 1.56 |
| 217810_x_at | LARS      | 0.0010583 | 0.0949 | 234.28 | 150.2  | 1.56 |
| 218359_at   | NRSN2     | 0.0075776 | 0.18   | 57.42  | 36.79  | 1.56 |
| 209224_s_at | NDUFA2    | 0.007743  | 0.181  | 38.95  | 24.9   | 1.56 |
| 201910_at   | FARP1     | 0.0078229 | 0.181  | 214.24 | 137.4  | 1.56 |
| 204693_at   | CDC42EP1  | 0.0084103 | 0.187  | 189.55 | 121.8  | 1.56 |
| 217960_s_at | TOMM22    | 0.0003507 | 0.0823 | 84.13  | 54.31  | 1.55 |
| 219981_x_at | ZNF587    | 0.0009988 | 0.0909 | 185.21 | 119.16 | 1.55 |
| 219266_at   | ZNF350    | 0.0036369 | 0.141  | 33.17  | 21.45  | 1.55 |
| 203032_s_at | FH        | 0.0059001 | 0.164  | 57.89  | 37.34  | 1.55 |
| 207573_x_at | ATP5L     | 0.0003148 | 0.0823 | 377.92 | 245.85 | 1.54 |
| 217797_at   | UFC1      | 0.0004313 | 0.0823 | 254.28 | 165.02 | 1.54 |
| 218107_at   | WDR26     | 0.0006005 | 0.0823 | 230.9  | 149.66 | 1.54 |
| 212763_at   | CAMSAP1L1 | 0.0011201 | 0.0975 | 163.09 | 106.17 | 1.54 |
| 205877_s_at | ZC3H7B    | 0.0017182 | 0.113  | 140.37 | 91.4   | 1.54 |
| 215124_at   | ZNF550    | 0.0031143 | 0.136  | 47.27  | 30.7   | 1.54 |
| 203054_s_at | TCTA      | 0.0032738 | 0.137  | 107.12 | 69.46  | 1.54 |
| 208475_at   | FRMD4A    | 0.0039745 | 0.146  | 52.94  | 34.33  | 1.54 |
| 213005_s_at | KANK1     | 0.0082648 | 0.186  | 59.74  | 38.78  | 1.54 |
| 205223_at   | DEPDC5    | 0.0090758 | 0.19   | 49.26  | 32.02  | 1.54 |

|             |           |           |        |        |        |      |
|-------------|-----------|-----------|--------|--------|--------|------|
| 218200_s_at | NDUFB2    | 0.0091787 | 0.19   | 102.4  | 66.37  | 1.54 |
| 209171_at   | ITPA      | 0.0001559 | 0.0805 | 84.55  | 55.17  | 1.53 |
| 212545_s_at | ZHX3      | 0.0006193 | 0.0823 | 38.71  | 25.31  | 1.53 |
| 208644_at   | PARP1     | 0.0006237 | 0.0823 | 132.11 | 86.32  | 1.53 |
| 206961_s_at | MED20     | 0.0007973 | 0.0867 | 71.6   | 46.91  | 1.53 |
| 207753_at   | ZNF304    | 0.001198  | 0.0988 | 32.46  | 21.27  | 1.53 |
| 203858_s_at | COX10     | 0.0029403 | 0.131  | 70.36  | 46.12  | 1.53 |
| 212215_at   | PREPL     | 0.0085507 | 0.187  | 195.1  | 127.45 | 1.53 |
| 202271_at   | FBXO28    | 0.0101499 | 0.196  | 158.61 | 103.97 | 1.53 |
| 219524_s_at | C20orf7   | 0.0006664 | 0.0825 | 14.97  | 9.87   | 1.52 |
| 201766_at   | ELAC2     | 0.0006807 | 0.0825 | 124.76 | 81.84  | 1.52 |
| 207304_at   | ZNF45     | 0.0029346 | 0.131  | 23.48  | 15.49  | 1.52 |
| 219433_at   | BCOR      | 0.0035983 | 0.141  | 61.3   | 40.45  | 1.52 |
| 222116_s_at | TBC1D16   | 0.0077096 | 0.18   | 58.62  | 38.63  | 1.52 |
| 207125_at   | ZNF225    | 0.0003589 | 0.0823 | 16.39  | 10.87  | 1.51 |
| 218626_at   | EIF4ENIF1 | 0.0024394 | 0.127  | 87.42  | 58.08  | 1.51 |
| 218887_at   | MRPL2     | 0.0032003 | 0.136  | 108.49 | 71.85  | 1.51 |
| 214631_at   | ZBTB33    | 0.0046297 | 0.152  | 67.03  | 44.48  | 1.51 |
| 204082_at   | PBX3      | 0.0092812 | 0.19   | 68.44  | 45.43  | 1.51 |
| 219676_at   | ZSCAN16   | 0.0035558 | 0.14   | 23.27  | 15.52  | 1.5  |
| 220233_at   | EST       | 0.0040113 | 0.146  | 95.25  | 63.45  | 1.5  |
| 200662_s_at | TOMM20    | 0.0048806 | 0.154  | 96.03  | 64.09  | 1.5  |
| 205750_at   | BPHL      | 0.0055548 | 0.161  | 43.91  | 29.2   | 1.5  |
| 203333_at   | KIFAP3    | 0.0063932 | 0.171  | 106.34 | 70.89  | 1.5  |
| 200635_s_at | PTPRF     | 0.0085403 | 0.187  | 208.58 | 139.11 | 1.5  |
| 207520_at   | TROVE2    | 0.0017646 | 0.113  | 170.09 | 113.96 | 1.49 |
| 214764_at   | RRP15     | 0.0023383 | 0.126  | 34.44  | 23.14  | 1.49 |
| 203181_x_at | SRPK2     | 0.0024045 | 0.126  | 156.19 | 105.01 | 1.49 |
| 202614_at   | SLC30A9   | 0.0026697 | 0.131  | 114.17 | 76.71  | 1.49 |
| 203956_at   | MORC2     | 0.0064192 | 0.171  | 108.88 | 72.84  | 1.49 |
| 215192_at   | PMS2L4    | 0.0079801 | 0.183  | 382.03 | 256.49 | 1.49 |
| 201771_at   | SCAMP3    | 0.0081179 | 0.184  | 199.51 | 133.74 | 1.49 |
| 204593_s_at | SMCR7L    | 0.0094219 | 0.191  | 46.5   | 31.23  | 1.49 |
| 206188_at   | ZNF623    | 0.0002345 | 0.0823 | 85.97  | 58.19  | 1.48 |
| 205169_at   | RBBP5     | 0.0006252 | 0.0823 | 72.09  | 48.84  | 1.48 |
| 220661_s_at | ZNF692    | 0.0006952 | 0.0825 | 100.39 | 67.88  | 1.48 |
| 202480_s_at | DEDD      | 0.0008531 | 0.0867 | 103.89 | 70.01  | 1.48 |
| 204977_at   | DDX10     | 0.0016664 | 0.112  | 39.18  | 26.49  | 1.48 |
| 203800_s_at | MRPS14    | 0.003426  | 0.138  | 66.31  | 44.67  | 1.48 |
| 203581_at   | RAB4A     | 0.0070776 | 0.174  | 55.04  | 37.08  | 1.48 |
| 200841_s_at | EPRS      | 0.0002499 | 0.0823 | 211.75 | 144.48 | 1.47 |
| 219244_s_at | MRPL46    | 0.0012195 | 0.0994 | 79.42  | 54.11  | 1.47 |
| 219184_x_at | TIMM22    | 0.0014368 | 0.105  | 107.19 | 72.7   | 1.47 |
| 212147_at   | SMG5      | 0.0015397 | 0.109  | 142.03 | 96.56  | 1.47 |
| 202184_s_at | NUP133    | 0.0016409 | 0.111  | 56.25  | 38.17  | 1.47 |
| 206075_s_at | CSNK2A1   | 0.0017831 | 0.113  | 397.89 | 270.14 | 1.47 |
| 203531_at   | CUL5      | 0.0024723 | 0.127  | 60.63  | 41.25  | 1.47 |
| 203155_at   | SETDB1    | 0.0044846 | 0.15   | 117.63 | 79.85  | 1.47 |
| 201821_s_at | TIMM17A   | 0.0098721 | 0.195  | 62.88  | 42.71  | 1.47 |
| 220992_s_at | C1orf25   | 0.0002061 | 0.0823 | 74.82  | 51.31  | 1.46 |
| 202373_s_at | RAB3GAP2  | 0.0012312 | 0.0994 | 117.24 | 80.48  | 1.46 |
| 213893_x_at | PMS2L5    | 0.0019328 | 0.116  | 202.24 | 138.49 | 1.46 |
| 220182_at   | SLC25A23  | 0.0045623 | 0.151  | 71.37  | 48.75  | 1.46 |
| 216983_s_at | ZNF224    | 0.0047162 | 0.152  | 66.66  | 45.67  | 1.46 |

|             |          |           |        |        |        |      |
|-------------|----------|-----------|--------|--------|--------|------|
| 204788_s_at | PPOX     | 0.0049506 | 0.155  | 22.41  | 15.36  | 1.46 |
| 208715_at   | TMCO1    | 0.002735  | 0.131  | 198.9  | 136.92 | 1.45 |
| 212894_at   | SUPV3L1  | 0.0033016 | 0.137  | 107.12 | 73.65  | 1.45 |
| 212591_at   | RBM34    | 0.0034252 | 0.138  | 58.31  | 40.32  | 1.45 |
| 204261_s_at | PSEN2    | 0.0044199 | 0.149  | 69.39  | 47.98  | 1.45 |
| 207164_s_at | ZNF238   | 0.0099915 | 0.195  | 41.33  | 28.58  | 1.45 |
| 218068_s_at | ZNF672   | 0.0004363 | 0.0823 | 89.67  | 62.37  | 1.44 |
| 205434_s_at | AAK1     | 0.0019337 | 0.116  | 108.12 | 75.12  | 1.44 |
| 219376_at   | EST      | 0.0020065 | 0.118  | 67.95  | 47.09  | 1.44 |
| 204699_s_at | C1orf107 | 0.0038877 | 0.144  | 52.64  | 36.49  | 1.44 |
| 202846_s_at | PIGC     | 0.0040693 | 0.146  | 45.97  | 31.97  | 1.44 |
| 218512_at   | WDR12    | 0.0040731 | 0.146  | 115.11 | 80.02  | 1.44 |
| 204287_at   | SYNGR1   | 0.0043659 | 0.148  | 42.8   | 29.65  | 1.44 |
| 219603_s_at | ZNF226   | 0.00603   | 0.166  | 30.87  | 21.41  | 1.44 |
| 211150_s_at | DLAT     | 0.0023794 | 0.126  | 91.43  | 63.74  | 1.43 |
| 203557_s_at | PCBD1    | 0.0028689 | 0.131  | 188.45 | 132.22 | 1.43 |
| 203429_s_at | C1orf9   | 0.0029416 | 0.131  | 73.12  | 51.03  | 1.43 |
| 214766_s_at | AHCTF1   | 0.0029652 | 0.131  | 99.9   | 69.94  | 1.43 |
| 205917_at   | ZNF264   | 0.0050502 | 0.157  | 114.14 | 79.63  | 1.43 |
| 201273_s_at | SRP9     | 0.0054464 | 0.161  | 98     | 68.39  | 1.43 |
| 203075_at   | SMAD2    | 0.0062031 | 0.169  | 118.85 | 83.14  | 1.43 |
| 213654_at   | TAF5L    | 0.0062479 | 0.169  | 65.44  | 45.72  | 1.43 |
| 218398_at   | MRPS30   | 0.0064031 | 0.171  | 90.65  | 63.6   | 1.43 |
| 214778_at   | MEGF8    | 0.007609  | 0.18   | 45.89  | 32.05  | 1.43 |
| 202019_s_at | LANCL1   | 0.0099836 | 0.195  | 98.85  | 69.16  | 1.43 |
| 219123_at   | ZNF232   | 1.46E-05  | 0.0353 | 11.47  | 8.07   | 1.42 |
| 202321_at   | GGPS1    | 0.0002867 | 0.0823 | 37.27  | 26.28  | 1.42 |
| 203502_at   | BPGM     | 0.0013697 | 0.105  | 49.4   | 34.9   | 1.42 |
| 209431_s_at | PATZ1    | 0.0027848 | 0.131  | 60.27  | 42.39  | 1.42 |
| 202261_at   | VPS72    | 0.0029063 | 0.131  | 154.01 | 108.48 | 1.42 |
| 218253_s_at | LGTN     | 0.0033536 | 0.137  | 80.08  | 56.39  | 1.42 |
| 204832_s_at | BMPR1A   | 0.007162  | 0.175  | 153.48 | 108.24 | 1.42 |
| 203985_at   | ZNF212   | 0.0094967 | 0.192  | 44.9   | 31.63  | 1.42 |
| 218379_at   | RBM7     | 0.0099584 | 0.195  | 32.66  | 23.05  | 1.42 |
| 213660_s_at | EST      | 0.0002804 | 0.0823 | 61.77  | 43.67  | 1.41 |
| 221517_s_at | MED17    | 0.0006601 | 0.0825 | 62.61  | 44.4   | 1.41 |
| 202326_at   | EHMT2    | 0.0008904 | 0.0867 | 69.88  | 49.67  | 1.41 |
| 212818_s_at | ASB1     | 0.0016162 | 0.111  | 52.88  | 37.57  | 1.41 |
| 203846_at   | TRIM32   | 0.0022826 | 0.123  | 46.79  | 33.11  | 1.41 |
| 212153_at   | POGZ     | 0.0052887 | 0.159  | 209.92 | 148.73 | 1.41 |
| 218784_s_at | C6orf64  | 0.0054453 | 0.161  | 45.73  | 32.4   | 1.41 |
| 218909_at   | RPS6KC1  | 0.0079425 | 0.182  | 83.43  | 59.29  | 1.41 |
| 202099_s_at | DGCR2    | 0.0008055 | 0.0867 | 141.73 | 101.41 | 1.4  |
| 215244_at   | DGCR5    | 0.0083838 | 0.187  | 43.39  | 30.9   | 1.4  |
| 205607_s_at | SCYL3    | 0.0087351 | 0.189  | 89.47  | 64.06  | 1.4  |
| 218721_s_at | C1orf27  | 2.93E-05  | 0.0507 | 79.88  | 57.39  | 1.39 |
| 220596_at   | GPATCH4  | 0.0004697 | 0.0823 | 32.58  | 23.47  | 1.39 |
| 215742_at   | EST      | 0.0009614 | 0.0895 | 160.24 | 115.11 | 1.39 |
| 219318_x_at | MED31    | 0.0013091 | 0.103  | 41.54  | 29.99  | 1.39 |
| 205527_s_at | GEMIN4   | 0.0022047 | 0.122  | 46.78  | 33.7   | 1.39 |
| 204138_s_at | MZF1     | 0.0051143 | 0.157  | 44.67  | 32.04  | 1.39 |
| 201536_at   | DUSP3    | 0.0071896 | 0.175  | 127.76 | 92.18  | 1.39 |
| 218262_at   | RMND5B   | 0.0082349 | 0.185  | 67.53  | 48.58  | 1.39 |
| 202190_at   | CSTF1    | 0.0088502 | 0.189  | 44.11  | 31.82  | 1.39 |

|             |          |           |        |        |        |      |
|-------------|----------|-----------|--------|--------|--------|------|
| 213916_at   | EST      | 0.0004823 | 0.0823 | 11.48  | 8.3    | 1.38 |
| 212683_at   | SLC25A44 | 0.0054848 | 0.161  | 62     | 44.86  | 1.38 |
| 219151_s_at | EST      | 0.0069065 | 0.174  | 84.63  | 61.43  | 1.38 |
| 202251_at   | PRPF3    | 0.0009749 | 0.0901 | 174.08 | 127.19 | 1.37 |
| 218455_at   | NFS1     | 0.0022498 | 0.123  | 93.31  | 68.3   | 1.37 |
| 219097_x_at | C19orf42 | 0.0025893 | 0.129  | 129.26 | 94.45  | 1.37 |
| 204176_at   | KLHL20   | 0.0035092 | 0.14   | 101.28 | 73.89  | 1.37 |
| 219078_at   | GPATCH2  | 0.0048894 | 0.154  | 90     | 65.69  | 1.37 |
| 203730_s_at | ZKSCAN5  | 0.0049529 | 0.155  | 32.9   | 23.98  | 1.37 |
| 218873_at   | GON4L    | 0.0053068 | 0.159  | 81.64  | 59.51  | 1.37 |
| 214442_s_at | PIAS2    | 0.0073078 | 0.176  | 136.19 | 99.6   | 1.37 |
| 219960_s_at | UCHL5    | 0.0078378 | 0.181  | 56.97  | 41.51  | 1.37 |
| 221090_s_at | OGFOD1   | 0.0084293 | 0.187  | 76.93  | 56.31  | 1.37 |
| 204991_s_at | NF2      | 0.0101192 | 0.196  | 80.76  | 58.96  | 1.37 |
| 215289_at   | ZNF749   | 0.0007404 | 0.0846 | 32.57  | 23.96  | 1.36 |
| 218527_at   | APTX     | 0.0008428 | 0.0867 | 38.36  | 28.15  | 1.36 |
| 208938_at   | PRCC     | 0.0017441 | 0.113  | 153.25 | 112.33 | 1.36 |
| 208314_at   | RRH      | 0.0018754 | 0.114  | 5.9    | 4.35   | 1.36 |
| 207268_x_at | ABI2     | 0.0056909 | 0.163  | 128.69 | 94.54  | 1.36 |
| 217865_at   | RNF130   | 0.008451  | 0.187  | 165.62 | 121.58 | 1.36 |
| 220516_at   | ZSCAN2   | 5.20E-06  | 0.0303 | 26.34  | 19.58  | 1.35 |
| 221201_s_at | ZNF155   | 0.0013362 | 0.104  | 16.54  | 12.24  | 1.35 |
| 201377_at   | UBAP2L   | 0.001825  | 0.113  | 337.82 | 249.6  | 1.35 |
| 219324_at   | EST      | 0.0037187 | 0.143  | 58.13  | 43.15  | 1.35 |
| 220067_at   | SPTBN5   | 0.0065151 | 0.172  | 19.46  | 14.38  | 1.35 |
| 207877_s_at | NVL      | 0.0084922 | 0.187  | 66.99  | 49.45  | 1.35 |
| 204327_s_at | ZNF202   | 0.0023878 | 0.126  | 32.48  | 24.24  | 1.34 |
| 201793_x_at | SMG7     | 0.0031328 | 0.136  | 136.39 | 102    | 1.34 |
| 207391_s_at | PIP5K1A  | 0.003337  | 0.137  | 203.35 | 151.28 | 1.34 |
| 219848_s_at | ZNF432   | 0.0037284 | 0.143  | 22.6   | 16.87  | 1.34 |
| 210638_s_at | FBXO9    | 0.0041687 | 0.146  | 45.95  | 34.3   | 1.34 |
| 205835_s_at | YTHDC2   | 0.0041889 | 0.146  | 76.91  | 57.6   | 1.34 |
| 218912_at   | GCC1     | 0.0045063 | 0.15   | 34.85  | 26.07  | 1.34 |
| 203612_at   | BYSL     | 0.0047494 | 0.152  | 56.51  | 42.22  | 1.34 |
| 213528_at   | C1orf156 | 0.0065448 | 0.172  | 20.87  | 15.52  | 1.34 |
| 219335_at   | ARMCX5   | 0.0069998 | 0.174  | 27.03  | 20.19  | 1.34 |
| 219016_at   | FASTKD5  | 0.0070685 | 0.174  | 50.53  | 37.59  | 1.34 |
| 219192_at   | UBAP2    | 0.0088124 | 0.189  | 139.03 | 104.02 | 1.34 |
| 219810_at   | VCPIP1   | 0.0009208 | 0.0873 | 147.94 | 110.88 | 1.33 |
| 212752_at   | CLASP1   | 0.0024439 | 0.127  | 191.92 | 143.89 | 1.33 |
| 221931_s_at | SEH1L    | 0.0032663 | 0.137  | 63.52  | 47.83  | 1.33 |
| 203092_at   | TIMM44   | 0.0043316 | 0.148  | 70.25  | 52.88  | 1.33 |
| 202420_s_at | DHX9     | 0.0047845 | 0.152  | 142.78 | 107.7  | 1.33 |
| 207515_s_at | POLR1C   | 0.0053195 | 0.159  | 93.4   | 70.4   | 1.33 |
| 218046_s_at | MRPS16   | 0.0063451 | 0.171  | 165.01 | 124.38 | 1.33 |
| 204071_s_at | TOPORS   | 0.0067445 | 0.174  | 45.99  | 34.53  | 1.33 |
| 200050_at   | ZNF146   | 0.0096137 | 0.193  | 80.15  | 60.06  | 1.33 |
| 212408_at   | TOR1AIP1 | 0.0001573 | 0.0805 | 70     | 53.09  | 1.32 |
| 218023_s_at | FAM53C   | 0.0021042 | 0.12   | 65.46  | 49.44  | 1.32 |
| 221837_at   | KLHL22   | 0.0021384 | 0.121  | 42.28  | 32.1   | 1.32 |
| 217860_at   | EST      | 0.002726  | 0.131  | 100.4  | 75.85  | 1.32 |
| 209511_at   | POLR2F   | 0.0058209 | 0.163  | 111.33 | 84.4   | 1.32 |
| 210151_s_at | DYRK3    | 0.0060964 | 0.167  | 31.44  | 23.79  | 1.32 |
| 208191_x_at | PSG4     | 0.0081216 | 0.184  | 26.4   | 20.03  | 1.32 |

|             |           |           |        |        |        |      |
|-------------|-----------|-----------|--------|--------|--------|------|
| 213124_at   | ZNF473    | 0.0090794 | 0.19   | 32.47  | 24.58  | 1.32 |
| 201706_s_at | PEX19     | 0.0099482 | 0.195  | 79.22  | 59.84  | 1.32 |
| 218993_at   | RNMTL1    | 0.0046752 | 0.152  | 37.19  | 28.49  | 1.31 |
| 214364_at   | MTERFD2   | 0.0075493 | 0.18   | 33.24  | 25.28  | 1.31 |
| 209654_at   | KIAA0947  | 0.0084591 | 0.187  | 73.65  | 56.11  | 1.31 |
| 202224_at   | CRK       | 0.0014016 | 0.105  | 162.56 | 125.05 | 1.3  |
| 206175_x_at | ZNF222    | 0.0033085 | 0.137  | 14.4   | 11.12  | 1.3  |
| 205117_at   | FGF1      | 0.0038837 | 0.144  | 13.41  | 10.28  | 1.3  |
| 207495_at   | RAB28     | 0.0044088 | 0.149  | 37.57  | 28.79  | 1.3  |
| 218637_at   | IMPACT    | 0.0089745 | 0.19   | 42.94  | 32.93  | 1.3  |
| 202026_at   | SDHD      | 0.0095961 | 0.193  | 118.03 | 90.72  | 1.3  |
| 216338_s_at | YIPF3     | 0.0071184 | 0.175  | 214.77 | 166.35 | 1.29 |
| 208827_at   | PSMB6     | 0.0103703 | 0.199  | 119.55 | 92.78  | 1.29 |
| 202702_at   | TRIM26    | 9.57E-05  | 0.0724 | 80.45  | 62.81  | 1.28 |
| 200593_s_at | HNRNPU    | 0.0018107 | 0.113  | 512.01 | 399.55 | 1.28 |
| 219931_s_at | KLHL12    | 0.0023468 | 0.126  | 90.75  | 70.99  | 1.28 |
| 217900_at   | IARS2     | 0.0034682 | 0.139  | 143.22 | 111.8  | 1.28 |
| 212557_at   | ZNF451    | 0.0068076 | 0.174  | 79.03  | 61.79  | 1.28 |
| 218672_at   | SCNM1     | 0.0102369 | 0.197  | 104.73 | 81.6   | 1.28 |
| 208289_s_at | EI24      | 0.0071511 | 0.175  | 199.09 | 156.6  | 1.27 |
| 219013_at   | GALNT11   | 0.007664  | 0.18   | 121.59 | 96.11  | 1.27 |
| 214840_at   | TOM1L2    | 0.0104631 | 0.199  | 59.1   | 46.49  | 1.27 |
| 203467_at   | PMM1      | 0.0013026 | 0.103  | 54.13  | 43.11  | 1.26 |
| 203172_at   | FXR2      | 0.0045707 | 0.151  | 93.28  | 73.98  | 1.26 |
| 209165_at   | AATF      | 0.0001434 | 0.0805 | 112.08 | 89.48  | 1.25 |
| 215490_at   | C1orf69   | 0.0013876 | 0.105  | 27.51  | 22.08  | 1.25 |
| 201269_s_at | NUDCD3    | 0.0033471 | 0.137  | 108.3  | 86.38  | 1.25 |
| 203013_at   | ECD       | 0.0042282 | 0.146  | 74.23  | 59.18  | 1.25 |
| 220830_at   | IMPG2     | 0.0090776 | 0.19   | 11.68  | 9.38   | 1.25 |
| 204795_at   | PRR3      | 0.0009823 | 0.0901 | 53.15  | 42.71  | 1.24 |
| 202097_at   | NUP153    | 0.0055648 | 0.161  | 153.28 | 124.11 | 1.23 |
| 218118_s_at | TIMM23    | 0.0019419 | 0.116  | 31.68  | 26.29  | 1.21 |
| 219292_at   | THAP1     | 0.0099597 | 0.195  | 48.04  | 40.05  | 1.2  |
| 215854_at   | EST       | 0.0047551 | 0.152  | 122.41 | 103.32 | 1.18 |
| 205181_at   | ZNF193    | 0.0055157 | 0.161  | 35.13  | 29.66  | 1.18 |
| 204773_at   | IL11RA    | 0.007213  | 0.175  | 35.02  | 30.03  | 1.17 |
| 210525_x_at | C14orf143 | 0.0043025 | 0.148  | 15.83  | 14.31  | 1.11 |
| 221008_s_at | AGXT2L1   | 0.0058657 | 0.163  | 5.03   | 5.76   | 0.87 |
| 205025_at   | ZBTB48    | 0.0099316 | 0.195  | 18.71  | 21.61  | 0.87 |
| 220200_s_at | SETD8     | 0.0091639 | 0.19   | 51.66  | 60.38  | 0.86 |
| 213372_at   | PAQR3     | 0.0095231 | 0.192  | 8.51   | 9.87   | 0.86 |
| 221680_s_at | ETV7      | 0.0040938 | 0.146  | 12.1   | 14.18  | 0.85 |
| 203503_s_at | PEX14     | 0.0075562 | 0.18   | 42.11  | 49.61  | 0.85 |
| 217994_x_at | CPSF3L    | 0.0005368 | 0.0823 | 61.46  | 73.55  | 0.84 |
| 204890_s_at | LCK       | 0.0101102 | 0.196  | 25.16  | 30.04  | 0.84 |
| 219282_s_at | TRPV2     | 0.000477  | 0.0823 | 25.72  | 31.15  | 0.83 |
| 200644_at   | MARCKSL1  | 0.0055476 | 0.161  | 334.72 | 403.1  | 0.83 |
| 207765_s_at | KIAA1539  | 0.0099931 | 0.195  | 40.61  | 48.83  | 0.83 |
| 203098_at   | CDYL      | 0.0062754 | 0.17   | 50.8   | 61.72  | 0.82 |
| 207760_s_at | NCOR2     | 0.0080339 | 0.183  | 50.27  | 61.03  | 0.82 |
| 219142_at   | RASL11B   | 0.0008707 | 0.0867 | 10.7   | 13.28  | 0.81 |
| 219287_at   | KCNMB4    | 0.0009239 | 0.0873 | 20.61  | 25.5   | 0.81 |
| 218132_s_at | TSEN34    | 0.0085791 | 0.187  | 32.6   | 40.27  | 0.81 |
| 202196_s_at | DKK3      | 0.0094406 | 0.191  | 22.77  | 28.07  | 0.81 |



|             |          |           |        |        |        |      |
|-------------|----------|-----------|--------|--------|--------|------|
| 213242_x_at | KIAA0284 | 0.0004017 | 0.0823 | 46.3   | 57.94  | 0.8  |
| 201063_at   | RCN1     | 0.0021604 | 0.121  | 78.88  | 98.43  | 0.8  |
| 203230_at   | DVL1     | 0.0028081 | 0.131  | 68.72  | 85.85  | 0.8  |
| 211489_at   | ADRA1A   | 0.0042168 | 0.146  | 6.05   | 7.54   | 0.8  |
| 202009_at   | TWF2     | 0.0078088 | 0.181  | 99.36  | 123.84 | 0.8  |
| 213755_s_at | SKI      | 0.008225  | 0.185  | 84.44  | 107.1  | 0.79 |
| 221241_s_at | BCL2L14  | 0.0091381 | 0.19   | 12.02  | 15.26  | 0.79 |
| 205020_s_at | ARL4A    | 0.0022749 | 0.123  | 27.01  | 34.68  | 0.78 |
| 209124_at   | MYD88    | 0.0052361 | 0.158  | 53.38  | 68.42  | 0.78 |
| 211597_s_at | HOPX     | 0.0071682 | 0.175  | 25.65  | 32.82  | 0.78 |
| 218076_s_at | ARHGAP17 | 0.0091798 | 0.19   | 49.26  | 63.14  | 0.78 |
| 205872_x_at | PDE4DIP  | 0.0005719 | 0.0823 | 41.59  | 54.04  | 0.77 |
| 212886_at   | CCDC69   | 0.0017784 | 0.113  | 15.26  | 19.89  | 0.77 |
| 218611_at   | IER5     | 0.0038805 | 0.144  | 76.54  | 99.45  | 0.77 |
| 204164_at   | SIPA1    | 0.0068258 | 0.174  | 43.87  | 56.68  | 0.77 |
| 208058_s_at | MGAT3    | 0.0097309 | 0.195  | 22.09  | 28.8   | 0.77 |
| 204328_at   | TMC6     | 0.0020928 | 0.12   | 50.7   | 66.84  | 0.76 |
| 218077_s_at | ZDHHC3   | 0.0025308 | 0.129  | 50.61  | 66.97  | 0.76 |
| 202847_at   | PCK2     | 0.0086151 | 0.188  | 29.52  | 38.87  | 0.76 |
| 207425_s_at | 9-Sep    | 0.0100581 | 0.196  | 105.74 | 139.18 | 0.76 |
| 206244_at   | CR1      | 0.0005917 | 0.0823 | 8.84   | 11.77  | 0.75 |
| 219431_at   | ARHGAP10 | 0.0025616 | 0.129  | 15.69  | 20.99  | 0.75 |
| 203069_at   | SV2A     | 0.0036366 | 0.141  | 16.35  | 21.89  | 0.75 |
| 205325_at   | PHYHIP   | 0.0049052 | 0.154  | 12.72  | 17.06  | 0.75 |
| 211962_s_at | ZFP36L1  | 0.0091032 | 0.19   | 324.46 | 430.48 | 0.75 |
| 209651_at   | TGFB1I1  | 0.000184  | 0.0823 | 55.33  | 74.89  | 0.74 |
| 203275_at   | IRF2     | 0.0016758 | 0.112  | 101.77 | 138.43 | 0.74 |
| 218144_s_at | INF2     | 0.002638  | 0.13   | 77.51  | 104.4  | 0.74 |
| 221218_s_at | TPK1     | 0.0052347 | 0.158  | 10.93  | 14.79  | 0.74 |
| 212146_at   | PLEKHM2  | 0.0061309 | 0.168  | 68.22  | 92.58  | 0.74 |
| 204456_s_at | GAS1     | 0.0091357 | 0.19   | 20.48  | 27.64  | 0.74 |
| 202501_at   | MAPRE2   | 0.0093889 | 0.191  | 86.18  | 116.99 | 0.74 |
| 219143_s_at | RPP25    | 0.001575  | 0.11   | 24.52  | 33.41  | 0.73 |
| 204683_at   | ICAM2    | 0.0026296 | 0.13   | 26.8   | 36.64  | 0.73 |
| 219400_at   | CNTNAP1  | 0.0043703 | 0.148  | 22.39  | 30.65  | 0.73 |
| 214204_at   | PACRG    | 0.0070684 | 0.174  | 7.97   | 10.92  | 0.73 |
| 218086_at   | NPDC1    | 0.0094096 | 0.191  | 46.95  | 64.23  | 0.73 |
| 206046_at   | ADAM23   | 7.33E-05  | 0.0634 | 7.85   | 10.84  | 0.72 |
| 219888_at   | SPAG4    | 0.000806  | 0.0867 | 13.77  | 19.07  | 0.72 |
| 210632_s_at | SGCA     | 0.0037683 | 0.143  | 23.25  | 32.07  | 0.72 |
| 206127_at   | ELK3     | 0.0056186 | 0.162  | 66.43  | 92.57  | 0.72 |
| 204894_s_at | AOC3     | 0.0067316 | 0.174  | 43.29  | 60.37  | 0.72 |
| 201642_at   | IFNGR2   | 0.0093581 | 0.191  | 89.84  | 125.46 | 0.72 |
| 211564_s_at | PDLIM4   | 0.0002115 | 0.0823 | 22.56  | 31.57  | 0.71 |
| 208026_at   | HIST1H4F | 0.0007136 | 0.0831 | 14.78  | 20.68  | 0.71 |
| 217855_x_at | SDF4     | 0.0036526 | 0.141  | 99.42  | 140.21 | 0.71 |
| 218751_s_at | FBXW7    | 0.0037694 | 0.143  | 19.28  | 27.18  | 0.71 |
| 205179_s_at | ADAM8    | 0.0041542 | 0.146  | 38.23  | 53.74  | 0.71 |
| 201338_x_at | GTF3A    | 0.0041818 | 0.146  | 46.51  | 65.09  | 0.71 |
| 201953_at   | CIB1     | 0.0064612 | 0.171  | 93.71  | 132.31 | 0.71 |
| 202701_at   | BMP1     | 0.0051926 | 0.158  | 41.05  | 59.01  | 0.7  |
| 205683_x_at | TPSAB1   | 0.0054872 | 0.161  | 34.01  | 48.88  | 0.7  |
| 205578_at   | ROR2     | 0.0069638 | 0.174  | 19.05  | 27.39  | 0.7  |
| 204194_at   | BACH1    | 0.0074918 | 0.18   | 56.97  | 81.75  | 0.7  |

|             |          |           |        |        |        |      |
|-------------|----------|-----------|--------|--------|--------|------|
| 207036_x_at | GRIN2D   | 0.0077749 | 0.181  | 19.13  | 27.3   | 0.7  |
| 202175_at   | CHPF     | 0.0090248 | 0.19   | 76.5   | 108.55 | 0.7  |
| 209850_s_at | CDC42EP2 | 0.0052323 | 0.158  | 34.19  | 49.33  | 0.69 |
| 214537_at   | HIST1H1D | 0.0055665 | 0.161  | 33.28  | 48.44  | 0.69 |
| 209946_at   | VEGFC    | 0.0062222 | 0.169  | 58.02  | 84.61  | 0.69 |
| 210190_at   | STX11    | 0.0067555 | 0.174  | 27.37  | 39.88  | 0.69 |
| 206476_s_at | NOVA2    | 0.0068371 | 0.174  | 32.88  | 47.32  | 0.69 |
| 204429_s_at | SLC2A5   | 0.0077004 | 0.18   | 20.45  | 29.62  | 0.69 |
| 206189_at   | UNC5C    | 0.0104263 | 0.199  | 16.8   | 24.25  | 0.69 |
| 203379_at   | RPS6KA1  | 0.0002741 | 0.0823 | 45.06  | 65.97  | 0.68 |
| 206580_s_at | EFEMP2   | 0.0004294 | 0.0823 | 44.76  | 66.19  | 0.68 |
| 203523_at   | LSP1     | 0.0032995 | 0.137  | 50.65  | 74.02  | 0.68 |
| 213767_at   | KSR1     | 0.0076311 | 0.18   | 42.63  | 62.99  | 0.68 |
| 201058_s_at | MYL9     | 0.0089596 | 0.19   | 97.16  | 143.82 | 0.68 |
| 212647_at   | RRAS     | 0.0091032 | 0.19   | 101.42 | 149.24 | 0.68 |
| 206242_at   | TM4SF5   | 0.0002556 | 0.0823 | 39.38  | 58.54  | 0.67 |
| 202727_s_at | IFNGR1   | 0.0002782 | 0.0823 | 19.07  | 28.25  | 0.67 |
| 219102_at   | RCN3     | 0.0019488 | 0.116  | 53.44  | 79.85  | 0.67 |
| 208047_s_at | NAB1     | 0.0022411 | 0.123  | 18.1   | 27.11  | 0.67 |
| 219529_at   | CLIC3    | 0.0025589 | 0.129  | 19.02  | 28.54  | 0.67 |
| 209684_at   | RIN2     | 0.0037636 | 0.143  | 66.56  | 98.77  | 0.67 |
| 209732_at   | CLEC2B   | 0.0041975 | 0.146  | 6.7    | 9.97   | 0.67 |
| 201307_at   | 11-Sep   | 0.0042198 | 0.146  | 198.66 | 296.83 | 0.67 |
| 202711_at   | EFNB1    | 0.0055819 | 0.161  | 30.83  | 46.36  | 0.67 |
| 201605_x_at | CNN2     | 0.0067989 | 0.174  | 123    | 183.38 | 0.67 |
| 218603_at   | HECA     | 0.0002704 | 0.0823 | 48.89  | 74.57  | 0.66 |
| 202205_at   | VASP     | 0.000525  | 0.0823 | 87.16  | 133.06 | 0.66 |
| 212915_at   | PDZRN3   | 0.0006527 | 0.0825 | 21.36  | 32.59  | 0.66 |
| 221814_at   | GPR124   | 0.0011986 | 0.0988 | 53     | 80.07  | 0.66 |
| 218832_x_at | ARRB1    | 0.0033749 | 0.137  | 48.08  | 73.03  | 0.66 |
| 211715_s_at | BDH1     | 0.0042554 | 0.146  | 13.56  | 20.49  | 0.66 |
| 202368_s_at | TRAM2    | 0.0092442 | 0.19   | 57.21  | 86.29  | 0.66 |
| 200974_at   | ACTA2    | 6.82E-05  | 0.0634 | 74.25  | 113.44 | 0.65 |
| 203650_at   | PROCR    | 0.0008683 | 0.0867 | 20.17  | 31.16  | 0.65 |
| 212046_x_at | MAPK3    | 0.0022048 | 0.122  | 75.29  | 116.07 | 0.65 |
| 219909_at   | MMP28    | 0.0043469 | 0.148  | 25.05  | 38.34  | 0.65 |
| 220272_at   | BNC2     | 0.0065469 | 0.172  | 14.01  | 21.42  | 0.65 |
| 217762_s_at | RAB31    | 0.0086791 | 0.188  | 111.96 | 172.8  | 0.65 |
| 202075_s_at | PLTP     | 0.0007143 | 0.0831 | 54.84  | 86.03  | 0.64 |
| 204931_at   | TCF21    | 0.0011358 | 0.0982 | 17.99  | 27.93  | 0.64 |
| 221478_at   | BNIP3L   | 0.0028166 | 0.131  | 129.88 | 204.28 | 0.64 |
| 203325_s_at | COL5A1   | 0.0040453 | 0.146  | 89.99  | 141.55 | 0.64 |
| 207980_s_at | CITED2   | 0.0070334 | 0.174  | 54.58  | 85.25  | 0.64 |
| 205309_at   | SMPDL3B  | 0.0085376 | 0.187  | 21.18  | 33     | 0.64 |
| 205349_at   | GNA15    | 0.0085706 | 0.187  | 22.09  | 34.37  | 0.64 |
| 208453_s_at | XPNPEP1  | 0.0089719 | 0.19   | 101.02 | 158.74 | 0.64 |
| 203748_x_at | RBMS1    | 5.30E-06  | 0.0303 | 35.58  | 56.28  | 0.63 |
| 209156_s_at | COL6A2   | 0.0021679 | 0.121  | 99.02  | 156.18 | 0.63 |
| 203675_at   | NUCB2    | 0.003197  | 0.136  | 52.72  | 83.06  | 0.63 |
| 212268_at   | SERPINB1 | 0.003546  | 0.14   | 109.14 | 172.74 | 0.63 |
| 216873_s_at | ATP8B2   | 0.0040303 | 0.146  | 37.09  | 59.31  | 0.63 |
| 213038_at   | RNF19B   | 0.0070233 | 0.174  | 70     | 110.92 | 0.63 |
| 201654_s_at | HSPG2    | 0.0091146 | 0.19   | 152.04 | 243.15 | 0.63 |
| 210083_at   | SEMA7A   | 0.0095567 | 0.192  | 31.64  | 50.03  | 0.63 |

|             |          |           |        |         |         |      |
|-------------|----------|-----------|--------|---------|---------|------|
| 202519_at   | MLXIP    | 0.0008089 | 0.0867 | 85.52   | 138.46  | 0.62 |
| 207521_s_at | ATP2A3   | 0.0009303 | 0.0873 | 38.72   | 62.73   | 0.62 |
| 210841_s_at | NRP2     | 0.0058217 | 0.163  | 45.73   | 73.18   | 0.62 |
| 203110_at   | PTK2B    | 0.0003592 | 0.0823 | 40.12   | 65.63   | 0.61 |
| 202545_at   | PRKCD    | 0.001271  | 0.101  | 57.82   | 95.53   | 0.61 |
| 216336_x_at | EST      | 0.0027635 | 0.131  | 16.77   | 27.55   | 0.61 |
| 207540_s_at | SYK      | 0.0045612 | 0.151  | 46.8    | 76.2    | 0.61 |
| 218923_at   | CTBS     | 0.0050877 | 0.157  | 56.75   | 92.66   | 0.61 |
| 202987_at   | TRAF3IP2 | 0.0058251 | 0.163  | 43.98   | 71.67   | 0.61 |
| 203417_at   | MFAP2    | 0.0081283 | 0.184  | 53.3    | 87.56   | 0.61 |
| 204466_s_at | SNCA     | 0.0089904 | 0.19   | 13.08   | 21.46   | 0.61 |
| 204163_at   | EMILIN1  | 4.83E-05  | 0.0634 | 56.86   | 95.17   | 0.6  |
| 201194_at   | SEPW1    | 0.000646  | 0.0825 | 129.34  | 214.17  | 0.6  |
| 160020_at   | MMP14    | 0.0007725 | 0.0867 | 152.65  | 253.15  | 0.6  |
| 208405_s_at | CD164    | 0.0061262 | 0.168  | 259.24  | 435.36  | 0.6  |
| 213422_s_at | MXRA8    | 0.0071479 | 0.175  | 188.21  | 313.44  | 0.6  |
| 210002_at   | GATA6    | 0.0005281 | 0.0823 | 84.76   | 143.1   | 0.59 |
| 208310_s_at | EST      | 0.0017985 | 0.113  | 197.33  | 333.51  | 0.59 |
| 205627_at   | CDA      | 0.0018215 | 0.113  | 20.91   | 35.38   | 0.59 |
| 219249_s_at | FKBP10   | 0.0018352 | 0.113  | 63.69   | 108.04  | 0.59 |
| 219132_at   | PELI2    | 0.0042262 | 0.146  | 43.16   | 73.2    | 0.59 |
| 204442_x_at | LTBP4    | 0.008351  | 0.187  | 80.39   | 136.09  | 0.59 |
| 202375_at   | SEC24D   | 0.0089031 | 0.19   | 62.58   | 106.83  | 0.59 |
| 205080_at   | RARB     | 0.0093008 | 0.19   | 20.56   | 34.91   | 0.59 |
| 207050_at   | CACNA2D1 | 0.0003217 | 0.0823 | 18.12   | 31.48   | 0.58 |
| 209950_s_at | VILL     | 0.0045395 | 0.151  | 30.58   | 52.66   | 0.58 |
| 203835_at   | LRRC32   | 0.0050429 | 0.157  | 103.54  | 179.65  | 0.58 |
| 203729_at   | EMP3     | 0.0057396 | 0.163  | 40.25   | 69.68   | 0.58 |
| 204083_s_at | TPM2     | 0.0060814 | 0.167  | 79.65   | 137     | 0.58 |
| 212185_x_at | MT2A     | 0.0079389 | 0.182  | 318.42  | 546.84  | 0.58 |
| 217966_s_at | FAM129A  | 0.0087379 | 0.189  | 36.32   | 62.69   | 0.58 |
| 201666_at   | TIMP1    | 0.0102832 | 0.197  | 1333.42 | 2296.35 | 0.58 |
| 213010_at   | PRKCDBP  | 0.0003263 | 0.0823 | 38.43   | 67.79   | 0.57 |
| 213001_at   | ANGPTL2  | 0.001353  | 0.104  | 36.88   | 65.08   | 0.57 |
| 205715_at   | BST1     | 0.0017242 | 0.113  | 36.28   | 63.52   | 0.57 |
| 204326_x_at | MT1X     | 0.0058067 | 0.163  | 64.69   | 113.06  | 0.57 |
| 219778_at   | ZFPM2    | 0.0059953 | 0.166  | 22.21   | 39.12   | 0.57 |
| 204798_at   | MYB      | 0.0098652 | 0.195  | 7.76    | 13.65   | 0.57 |
| 217992_s_at | EFHD2    | 0.0002944 | 0.0823 | 67.61   | 120.93  | 0.56 |
| 200897_s_at | PALLD    | 0.0011518 | 0.0982 | 31.28   | 55.75   | 0.56 |
| 209928_s_at | MSC      | 0.0014184 | 0.105  | 29.24   | 51.95   | 0.56 |
| 212651_at   | RHOBTB1  | 0.0035151 | 0.14   | 31.29   | 56.31   | 0.56 |
| 214454_at   | ADAMTS2  | 0.0038596 | 0.144  | 54.17   | 97.59   | 0.56 |
| 205547_s_at | TAGLN    | 0.0067748 | 0.174  | 170.2   | 301.27  | 0.56 |
| 217730_at   | TMBIM1   | 0.0075351 | 0.18   | 382.48  | 686.54  | 0.56 |
| 201562_s_at | SORD     | 0.0065346 | 0.172  | 51.6    | 93.12   | 0.55 |
| 204401_at   | KCNN4    | 0.0002901 | 0.0823 | 20.33   | 37.98   | 0.54 |
| 219045_at   | RHOF     | 0.0013273 | 0.104  | 24.94   | 46.05   | 0.54 |
| 205168_at   | DDR2     | 0.0038124 | 0.143  | 29.94   | 55.3    | 0.54 |
| 201852_x_at | COL3A1   | 0.0076059 | 0.18   | 577.38  | 1069.8  | 0.54 |
| 204688_at   | SGCE     | 0.0092702 | 0.19   | 42.85   | 79.33   | 0.54 |
| 214774_x_at | TOX3     | 0.0003754 | 0.0823 | 33.55   | 63.63   | 0.53 |
| 202794_at   | INPP1    | 0.0007343 | 0.0846 | 34.29   | 64.42   | 0.53 |
| 222379_at   | KCNE4    | 0.0017121 | 0.113  | 27.16   | 51.33   | 0.53 |

|             |          |           |        |        |        |      |
|-------------|----------|-----------|--------|--------|--------|------|
| 218847_at   | IGF2BP2  | 0.002803  | 0.131  | 57.25  | 108.47 | 0.53 |
| 202765_s_at | FBN1     | 0.0037894 | 0.143  | 106.1  | 201.61 | 0.53 |
| 203904_x_at | CD82     | 1.79E-05  | 0.0361 | 105.97 | 202.21 | 0.52 |
| 220613_s_at | SYTL2    | 0.0005195 | 0.0823 | 16.3   | 31.31  | 0.52 |
| 204445_s_at | ALOX5    | 0.0018412 | 0.113  | 80.8   | 155.23 | 0.52 |
| 209655_s_at | TMEM47   | 0.0026063 | 0.129  | 98.09  | 189.08 | 0.52 |
| 201792_at   | AEBP1    | 0.005539  | 0.161  | 177.94 | 341.42 | 0.52 |
| 204994_at   | MX2      | 0.0069369 | 0.174  | 45.28  | 86.55  | 0.52 |
| 221729_at   | COL5A2   | 0.0086717 | 0.188  | 95.8   | 183.44 | 0.52 |
| 201425_at   | ALDH2    | 0.009238  | 0.19   | 119.9  | 229.65 | 0.52 |
| 203385_at   | DGKA     | 0.009815  | 0.195  | 67.66  | 130.14 | 0.52 |
| 201749_at   | ECE1     | 0.0003514 | 0.0823 | 102.97 | 200.86 | 0.51 |
| 203836_s_at | MAP3K5   | 0.0040601 | 0.146  | 40.6   | 79.32  | 0.51 |
| 210139_s_at | PMP22    | 0.0004664 | 0.0823 | 105.62 | 212.31 | 0.5  |
| 203988_s_at | FUT8     | 0.00084   | 0.0867 | 37.15  | 73.66  | 0.5  |
| 204253_s_at | VDR      | 0.0020694 | 0.12   | 17.58  | 35.34  | 0.5  |
| 205141_at   | ANG      | 0.0058491 | 0.163  | 38.16  | 75.63  | 0.5  |
| 201261_x_at | BGN      | 0.0062895 | 0.17   | 391.27 | 789.07 | 0.5  |
| 205174_s_at | QPCT     | 0.0084306 | 0.187  | 16.75  | 33.58  | 0.5  |
| 200784_s_at | LRP1     | 0.0004764 | 0.0823 | 144.44 | 293.66 | 0.49 |
| 202820_at   | AHR      | 0.0031668 | 0.136  | 122.77 | 249.45 | 0.49 |
| 209101_at   | CTGF     | 0.0080177 | 0.183  | 196.78 | 403.62 | 0.49 |
| 209182_s_at | C10orf10 | 0.0099468 | 0.195  | 160.41 | 326.47 | 0.49 |
| 213059_at   | CREB3L1  | 6.90E-05  | 0.0634 | 22.54  | 47.15  | 0.48 |
| 220388_at   | FER1L4   | 0.0008879 | 0.0867 | 22.21  | 46.37  | 0.48 |
| 201761_at   | MTHFD2   | 0.0013769 | 0.105  | 25.93  | 54.18  | 0.48 |
| 206539_s_at | CYP4F12  | 0.0017783 | 0.113  | 10.53  | 22.59  | 0.47 |
| 203058_s_at | PAPSS2   | 0.0020669 | 0.12   | 58.19  | 122.71 | 0.47 |
| 220518_at   | ABI3BP   | 0.0027375 | 0.131  | 25.42  | 53.56  | 0.47 |
| 209708_at   | MOXD1    | 0.0057015 | 0.163  | 37.88  | 80.41  | 0.47 |
| 200632_s_at | NDRG1    | 0.0077183 | 0.18   | 210.26 | 449.91 | 0.47 |
| 204378_at   | BCAS1    | 0.0047064 | 0.152  | 14.21  | 30.99  | 0.46 |
| 209365_s_at | ECM1     | 0.0067922 | 0.174  | 46.04  | 99.58  | 0.46 |
| 201324_at   | EMP1     | 0.0092867 | 0.19   | 84.11  | 183.09 | 0.46 |
| 207463_x_at | PRSS3    | 0.0015079 | 0.107  | 28.01  | 61.67  | 0.45 |
| 205068_s_at | ARHGAP26 | 0.0047464 | 0.152  | 88.12  | 196.13 | 0.45 |
| 212925_at   | C19orf21 | 0.0078111 | 0.181  | 27.87  | 62.15  | 0.45 |
| 220945_x_at | MANSC1   | 0.0102524 | 0.197  | 30.03  | 67.05  | 0.45 |
| 201829_at   | NET1     | 0.0006681 | 0.0825 | 81.24  | 183.8  | 0.44 |
| 203499_at   | EPHA2    | 0.0008389 | 0.0867 | 38.01  | 87.25  | 0.44 |
| 206514_s_at | EST      | 0.0010296 | 0.093  | 23.22  | 52.41  | 0.44 |
| 209621_s_at | PDLIM3   | 0.0013988 | 0.105  | 27.82  | 63.18  | 0.44 |
| 208505_s_at | FUT2     | 0.0090966 | 0.19   | 16.32  | 37.27  | 0.44 |
| 204472_at   | GEM      | 0.0071997 | 0.175  | 65.56  | 154.2  | 0.43 |
| 205076_s_at | MTMR11   | 0.0097832 | 0.195  | 56.62  | 131.03 | 0.43 |
| 207601_at   | SULT1B1  | 0.0028277 | 0.131  | 6.15   | 14.74  | 0.42 |
| 204748_at   | PTGS2    | 0.0033439 | 0.137  | 18.78  | 46.28  | 0.41 |
| 211726_s_at | FMO2     | 0.0044184 | 0.149  | 12.9   | 31.4   | 0.41 |
| 203083_at   | THBS2    | 0.0012657 | 0.101  | 233.18 | 585.72 | 0.4  |
| 207415_at   | PLA2R1   | 0.0025456 | 0.129  | 29.25  | 72.43  | 0.4  |
| 209955_s_at | FAP      | 0.0047813 | 0.152  | 36.39  | 91.41  | 0.4  |
| 217892_s_at | LIMA1    | 0.0027584 | 0.131  | 60.71  | 154.99 | 0.39 |
| 202411_at   | IFI27    | 0.0046967 | 0.152  | 57.16  | 147.69 | 0.39 |
| 218657_at   | RAPGEFL1 | 0.0051546 | 0.157  | 20.49  | 52.43  | 0.39 |

|             |          |           |        |        |        |       |
|-------------|----------|-----------|--------|--------|--------|-------|
| 209924_at   | CCL18    | 0.0065046 | 0.172  | 17.94  | 45.58  | 0.39  |
| 212543_at   | AIM1     | 0.0006812 | 0.0825 | 23.31  | 61.82  | 0.38  |
| 212092_at   | PEG10    | 0.0028333 | 0.131  | 16.18  | 42.4   | 0.38  |
| 203913_s_at | HPGD     | 0.0027505 | 0.131  | 6.39   | 17.1   | 0.37  |
| 217979_at   | TSPAN13  | 0.0029072 | 0.131  | 32.69  | 87.37  | 0.37  |
| 201474_s_at | ITGA3    | 0.006191  | 0.169  | 77.53  | 210.66 | 0.37  |
| 206084_at   | PTPRR    | 0.0067501 | 0.174  | 6.53   | 17.64  | 0.37  |
| 219934_s_at | SULT1E1  | 0.0098864 | 0.195  | 3.45   | 9.42   | 0.37  |
| 205892_s_at | FABP1    | 0.0006929 | 0.0825 | 6.97   | 19.43  | 0.36  |
| 206805_at   | SEMA3A   | 0.0015851 | 0.11   | 12.92  | 36.25  | 0.36  |
| 220034_at   | IRAK3    | 0.0025317 | 0.129  | 11.83  | 32.58  | 0.36  |
| 202434_s_at | CYP1B1   | 0.007424  | 0.178  | 52.91  | 146.35 | 0.36  |
| 204745_x_at | MT1G     | 6.00E-04  | 0.0823 | 53.71  | 152.16 | 0.35  |
| 205515_at   | PRSS12   | 0.0031443 | 0.136  | 21.51  | 60.77  | 0.35  |
| 200824_at   | GSTP1    | 0.009914  | 0.195  | 165.25 | 473.9  | 0.35  |
| 206391_at   | RARRES1  | 0.0087993 | 0.189  | 22.41  | 66.51  | 0.34  |
| 213432_at   | MUC5B    | 0.0022796 | 0.123  | 19.36  | 59.27  | 0.33  |
| 208131_s_at | PTGIS    | 0.0002147 | 0.0823 | 28.91  | 89.85  | 0.32  |
| 209211_at   | KLF5     | 0.0008112 | 0.0867 | 54.33  | 169.03 | 0.32  |
| 203868_s_at | VCAM1    | 0.0008965 | 0.0867 | 41.49  | 130.31 | 0.32  |
| 209373_at   | MALL     | 0.0018537 | 0.113  | 36.48  | 114.34 | 0.32  |
| 205668_at   | LY75     | 0.0041047 | 0.146  | 21.23  | 65.77  | 0.32  |
| 203819_s_at | IGF2BP3  | 0.004721  | 0.152  | 9.48   | 30.23  | 0.31  |
| 220021_at   | TMC7     | 0.005817  | 0.163  | 30.16  | 96.39  | 0.31  |
| 207852_at   | CXCL5    | 0.0051147 | 0.157  | 108    | 360.34 | 0.3   |
| 202887_s_at | DDIT4    | 0.0001866 | 0.0823 | 70.55  | 240.63 | 0.29  |
| 215129_at   | PIK3C2G  | 0.0034096 | 0.138  | 5.89   | 20.13  | 0.29  |
| 205568_at   | AQP9     | 0.005825  | 0.163  | 16.46  | 57.2   | 0.29  |
| 202934_at   | HK2      | 0.0064484 | 0.171  | 34.05  | 117.53 | 0.29  |
| 213975_s_at | LYZ      | 0.0088376 | 0.189  | 124.47 | 434.03 | 0.29  |
| 201842_s_at | EFEMP1   | 0.003606  | 0.141  | 92.05  | 331.78 | 0.28  |
| 218322_s_at | ACSL5    | 0.0010746 | 0.0956 | 31.07  | 123.4  | 0.25  |
| 204602_at   | DKK1     | 0.0030733 | 0.135  | 7.98   | 33.81  | 0.24  |
| 202488_s_at | FXD3     | 0.0033393 | 0.137  | 45.65  | 189.14 | 0.24  |
| 204855_at   | SERPIN5  | 0.0077061 | 0.18   | 5.82   | 23.8   | 0.24  |
| 208170_s_at | TRIM31   | 8.43E-05  | 0.068  | 12.09  | 52.74  | 0.23  |
| 216666_at   | LOC93432 | 0.0051002 | 0.157  | 7.67   | 33.91  | 0.23  |
| 204116_at   | IL2RG    | 0.000135  | 0.0805 | 45.54  | 206.66 | 0.22  |
| 207847_s_at | MUC1     | 0.0012291 | 0.0994 | 58.46  | 294.96 | 0.2   |
| 219014_at   | PLAC8    | 0.0030249 | 0.133  | 13.35  | 69.03  | 0.19  |
| 209114_at   | TSPAN1   | 0.0053215 | 0.159  | 17.13  | 115.86 | 0.15  |
| 209847_at   | CDH17    | 0.0024602 | 0.127  | 12.02  | 83.56  | 0.14  |
| 203108_at   | GPRC5A   | 0.0037584 | 0.143  | 16.21  | 114.06 | 0.14  |
| 206239_s_at | SPINK1   | 0.004111  | 0.146  | 24.14  | 170.8  | 0.14  |
| 205597_at   | SLC44A4  | 0.0016886 | 0.112  | 27.1   | 226.07 | 0.12  |
| 208083_s_at | ITGB6    | 0.0011002 | 0.0972 | 10.66  | 95.77  | 0.11  |
| 209173_at   | AGR2     | 5.32E-05  | 0.0634 | 5.57   | 75.44  | 0.074 |
| 205927_s_at | CTSE     | 0.0004652 | 0.0823 | 17.13  | 292.26 | 0.059 |

<sup>a</sup>Genes are listed in order of fold change between ICC/HpSC-like and ICC/MH-like cases.

<sup>b</sup>FDR: False Discovery Rate

Table S3. 23 ICC-specific microRNAs<sup>a</sup>

| Unique id      | Parametric p-value | Geom mean of intensities in ICC/HpSC-like | Geom mean of intensities in ICC/MH-like | Fold-change (ICC/HpSC-like vs ICC/MH-like) |
|----------------|--------------------|-------------------------------------------|-----------------------------------------|--------------------------------------------|
| hsa-miR-200c   | 0.013773           | 9.4                                       | 122.51                                  | 0.077                                      |
| hsa-miR-141    | 0.0232948          | 5.82                                      | 47.09                                   | 0.12                                       |
| hsa-miR-139-5p | 0.0424683          | 3.41                                      | 9.03                                    | 0.38                                       |
| hsa-miR-105    | 0.0105404          | 2.68                                      | 5.36                                    | 0.5                                        |
| hsa-miR-1203   | 0.0486182          | 1.94                                      | 3.2                                     | 0.61                                       |
| hsa-miR-1248   | 0.0222381          | 1.22                                      | 1.94                                    | 0.63                                       |
| hsa-miR-629    | 0.0377526          | 2.67                                      | 4.05                                    | 0.66                                       |
| hsa-miR-1251   | 0.0344576          | 2.77                                      | 1.59                                    | 1.74                                       |
| hsa-miR-885-5p | 0.0355507          | 8.74                                      | 4.99                                    | 1.75                                       |
| hsa-miR-885-3p | 0.0482183          | 1.57                                      | 0.9                                     | 1.76                                       |
| hsa-miR-383    | 0.0111231          | 5.38                                      | 3                                       | 1.79                                       |
| hsa-miR-92a    | 0.021228           | 780.83                                    | 431.21                                  | 1.81                                       |
| hsa-miR-302c   | 0.0283948          | 2.79                                      | 1.51                                    | 1.84                                       |
| hsa-miR-649    | 0.0298556          | 2.21                                      | 1.06                                    | 2.07                                       |
| hsa-miR-30e    | 0.0049886          | 111.87                                    | 53.54                                   | 2.09                                       |
| hsa-miR-1538   | 0.0255434          | 2.46                                      | 1.16                                    | 2.12                                       |
| hsa-miR-30c    | 0.0231812          | 140.54                                    | 65.71                                   | 2.14                                       |
| hsa-miR-183    | 0.0498748          | 16.58                                     | 7.63                                    | 2.17                                       |
| hsa-miR-15b    | 0.0233879          | 163.12                                    | 72.72                                   | 2.24                                       |
| hsa-miR-96     | 0.0451614          | 283.52                                    | 107.27                                  | 2.64                                       |
| hsa-miR-30a    | 0.0054233          | 711.65                                    | 263.57                                  | 2.7                                        |
| hsa-miR-30d    | 0.0039945          | 227.54                                    | 83.98                                   | 2.71                                       |
| hsa-miR-30b    | 0.0014781          | 2852.67                                   | 824.48                                  | 3.46                                       |

<sup>a</sup>microRNAs are listed in order of fold change between ICC/HpSC-like and ICC/MH-like cases.

Table S4. Top 9 gene networks from Ingenuity Pathway Analysis

| ID | Molecules in Network                                                                                                                                                                                                                                                                                                                                                                                                                                                                                                                                      | Score | Focus Molecules | Top Functions                                                                                  |
|----|-----------------------------------------------------------------------------------------------------------------------------------------------------------------------------------------------------------------------------------------------------------------------------------------------------------------------------------------------------------------------------------------------------------------------------------------------------------------------------------------------------------------------------------------------------------|-------|-----------------|------------------------------------------------------------------------------------------------|
| 1  | AMPK, Creatine Kinase, <b>DLAT</b> , <b>FBXW11</b> , <b>FXR2</b> , Growth hormone, <b>HNRNPU</b> , <b>KLHL22</b> , <b>LCMT2</b> , <b>MAOB</b> , <b>MED20</b> , <b>MED31</b> , <b>NF2</b> , <b>NFS1</b> , <b>NUDCD3</b> (includes EG:23386), <b>PBX3</b> , <b>PCBD1</b> , <b>PDZK1</b> , PI3K (complex), <b>PPARGC1A</b> , <b>PRKAA2</b> , <b>PRLR</b> , <b>PTS</b> , <b>RAB4A</b> , <b>RBBP5</b> , RNA polymerase II, <b>SDHC</b> , <b>SDHD</b> , <b>SMYD2</b> , Succinate dehydrogenase, <b>THAP1</b> , TRAP/Media, <b>WDR26</b> , ZNF238, <b>ZNF451</b> | 49    | 28              | Cancer, Genetic Disorder, Metabolic Disease                                                    |
| 2  | <b>ABI2</b> , <b>AHCTF1</b> , <b>ALDH1B1</b> , <b>APCS</b> , <b>BCOR</b> , Cbp/p300, <b>CRP</b> , <b>CSNK2A1</b> , <b>DHX9</b> , <b>ENAH</b> , <b>GEMIN4</b> , <b>GMNN</b> , HISTONE, Holo RNA polymerase II, <b>MED17</b> , <b>MED7</b> (includes EG:9443), Mediator, NFkB (complex), <b>NUP133</b> , <b>NUP153</b> , Pias, <b>PIAS2</b> , <b>PIP5K1A</b> , <b>POLR2F</b> , <b>PPM1B</b> , <b>PRPF3</b> , <b>RANGAP1</b> , Rnr, <b>SEH1L</b> , <b>SNRPE</b> , <b>SNRPN</b> , <b>TAF5L</b> , <b>TOPORS</b> , <b>TRIM32</b> , <b>WDR12</b>                 | 47    | 28              | Cellular Assembly and Organization, Cell Death, Embryonic Development                          |
| 3  | <b>ALCAM</b> , <b>CAV2</b> , Collagen(s), <b>DUSP3</b> , ERK1/2, <b>FGF1</b> , Fgfr, <b>FGFR4</b> , <b>GAL3ST1</b> , <b>HABP2</b> , HDL, Laminin, <b>LAMP2</b> , Mek, Nos, Pdgf, PDGF BB, <b>PDGFD</b> , Pdgfr, PLC gamma, <b>PSEN2</b> , <b>PTPRF</b> , Rxr, <b>SMAD2</b> , Smad2/3, <b>SPP1</b> , Tgf beta, <b>TGFB2</b> , <b>TIMM22</b> , <b>TIMM44</b> , <b>TIMM17A</b> (includes EG:10440), <b>TIMM8A</b> , <b>TOMM20</b> , <b>TOMM22</b> , <b>TRIOBP</b>                                                                                            | 32    | 21              | Protein Trafficking, Cellular Movement, Organ Development                                      |
| 4  | <b>AATF</b> , Actin, <b>AGT</b> , Akt, <b>ALDH3A2</b> , <b>BMPR1A</b> , Caspase, Collagen type I, Creb, <b>CREB5</b> , <b>CTPS</b> , Cytochrome c, <b>DYRK3</b> , <b>EHMT2</b> , <b>EI24</b> , FSH, <b>GOT1</b> , hCG, Histone h3, Hsp70, Insulin, <b>INTS7</b> , <b>LBR</b> , Lh, <b>PMM1</b> , PP2A, <b>PPP2R3A</b> , <b>PVRL3</b> , <b>SETDB1</b> , <b>SMG5</b> , <b>SMG7</b> , <b>SRPK2</b> , <b>TBC1D8</b> , <b>TP53</b> , Vegf                                                                                                                      | 29    | 21              | Organ Morphology, Renal and Urological System Development and Function, Developmental Disorder |
| 5  | <b>ADRBK1</b> , ATN1, BAI3, CDH1, <b>DGCR2</b> , EMR1, <b>FBXO9</b> , FFAR3, <b>FXD2</b> , <b>GCC1</b> , Gpcr, <b>GPR75</b> , GPR87, <b>GPR137B</b> , IL12 (complex), Interferon alpha, <b>ITIH5</b> , <b>MEGF8</b> , MIR373, <b>MORC2</b> , <b>MRPL2</b> , <b>RMND5B</b> , <b>RNF14</b> , <b>RRH</b> , <b>SCTR</b> , <b>SLC25A23</b> , SMAD4, SMURF2, SSTR5, STAT4, STK11, <b>TCTA</b> , <b>VN1R1</b> , <b>ZBTB33</b> , <b>ZNF226</b>                                                                                                                    | 28    | 19              | Genetic Disorder, Renal and Urological Disease, Gastrointestinal Disease                       |
| 6  | 14-3-3, <b>AAK1</b> , <b>APTX</b> , <b>ARHGAP29</b> , <b>CRK</b> , <b>ELK4</b> , ERK, F Actin, Focal adhesion kinase, <b>GABBR1</b> , Gpcr, IgG, IL1, Jnk, <b>KANK1</b> , <b>KIFAP3</b> , <b>LASS2</b> , LDL, <b>MAN2A1</b> , <b>MDM4</b> , MIR1, MIR124, <b>MZF1</b> , P38 MAPK, <b>PARP1</b> , Pkc(s), <b>POGK</b> , <b>RABL2A</b> , Rac, Ras, Ras homolog, Rock, <b>SLC22A5</b> , <b>XPNPEP3</b> , <b>ZNF264</b>                                                                                                                                       | 26    | 18              | DNA Replication, Recombination, and Repair, Cancer, Gastrointestinal Disease                   |
| 7  | <b>ACO2</b> , APOA4, BAI1, <b>BCS1L</b> , <b>BPHL</b> , CDC5L, CTNBL1, <b>EIF4ENIF1</b> , HNF4A, <b>HOOK1</b> , <b>IL11RA</b> , JKAMP, MRPL53, MRPS21, NTHL1, POLR1B, <b>POLR1C</b> , POLR3E, POLR3G, POLRMT, <b>PRCC</b> , <b>PUS3</b> , <b>RNF5</b> (includes EG:6048), <b>RNMTL1</b> , RTCD1, <b>SARS2</b> , TRIM41, TRUB2, <b>VN1R1</b> , <b>ZNF193</b> , <b>ZNF202</b> , <b>ZNF232</b> , ZNF446, <b>ZNF473</b> , <b>ZSCAN16</b>                                                                                                                      | 26    | 18              | Genetic Disorder, Metabolic Disease, Renal and Urological Disease                              |
| 8  | ABCF3, <b>ANGEL2</b> , AP2A1, <b>C19ORF42</b> , <b>C1ORF25</b> , <b>C1ORF156</b> , CIAO1, DNAJA2, <b>FAM53C</b> , HNF1A, HNF4A, <b>LPGAT1</b> , <b>MRPL24</b> , <b>MRPL46</b> , <b>TBC1D16</b> , TOE1, <b>TP53</b> , <b>ZKSCAN5</b> , <b>ZNF146</b> , <b>ZNF155</b> , <b>ZNF222</b> , <b>ZNF225</b> , <b>ZNF304</b>                                                                                                                                                                                                                                       | 24    | 16              | Gene Expression, Infection Mechanism, Cancer                                                   |
| 9  | <b>C14ORF147</b> , <b>CBLL1</b> , CDC5L, CDH1, <b>FH</b> , HNF1A, HNF4A, MDH2, <b>MTR</b> , <b>NVL</b> , POLRMT, <b>PRCC</b> , PRKAB1, <b>PRR3</b> , <b>RPS6KC1</b> , <b>SCYL3</b> , <b>SLC38A1</b> , SRPR, SRSF2, <b>SSR2</b> , <b>TFB2M</b> , TRAPPC3, <b>TRAPPC4</b> , TRAPPC6A, TUBB4, <b>WARS2</b> , <b>ZNF224</b> , <b>ZSCAN16</b>                                                                                                                                                                                                                  | 24    | 16              | Energy Production, Small Molecule Biochemistry, Gene Expression                                |

NOTE. The score is a numerical value used to rank networks according to how relevant they are to the genes in the input dataset. The score takes into account the number of genes in the networks and the size of the network to approximate how relevant this network is to the input gene list. Gene symbols highlighted in bold are those included in the input gene list. The top 9 pathways were selected based on the score (score > 20)
