# Supplementary material
Source: PubMed Central journal article supplement (PMC3458130)

Figure S1

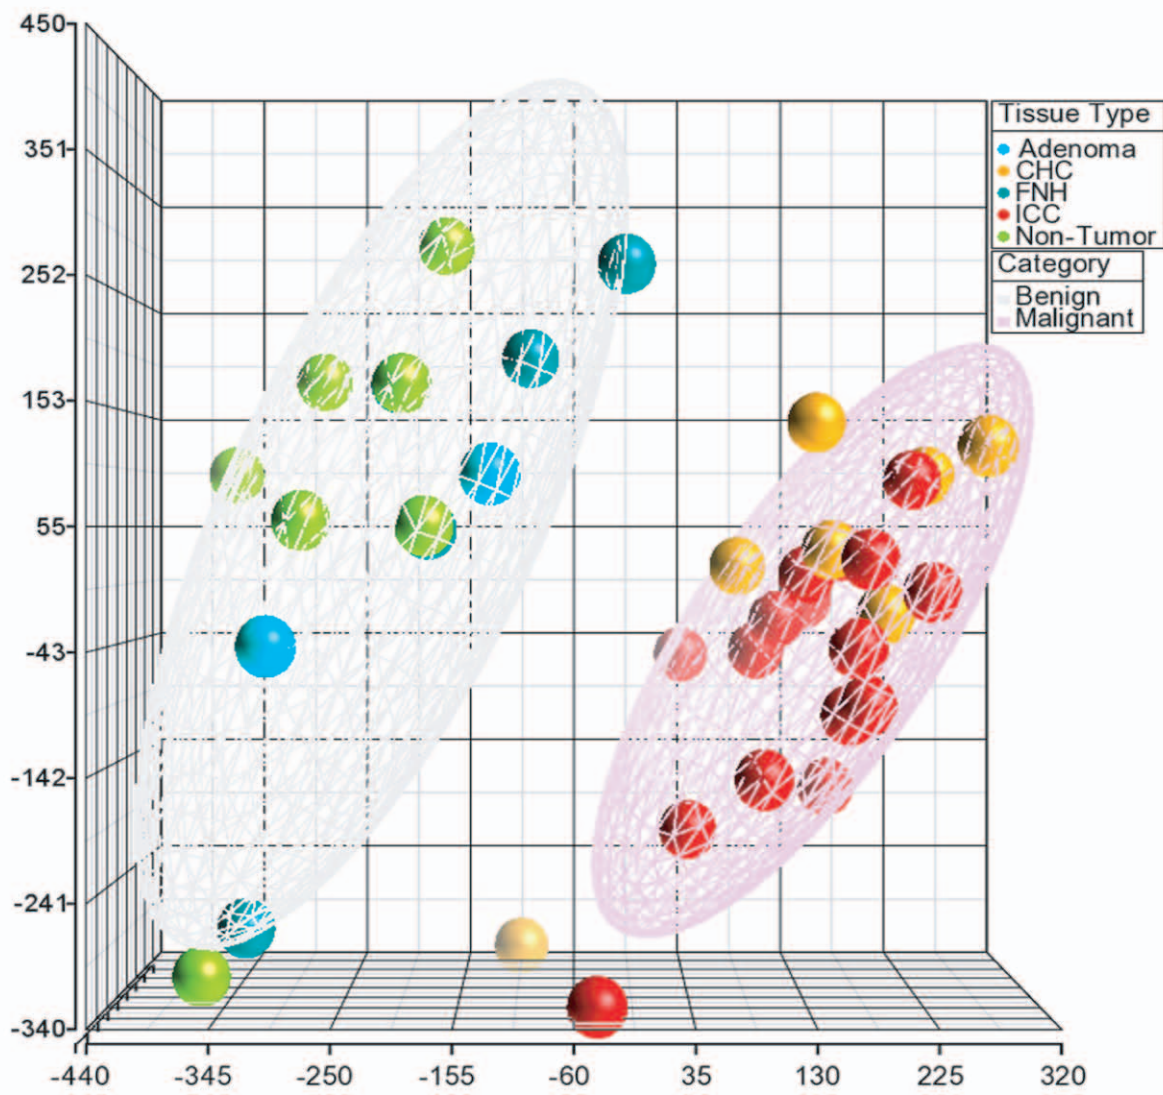

Figure S2

A

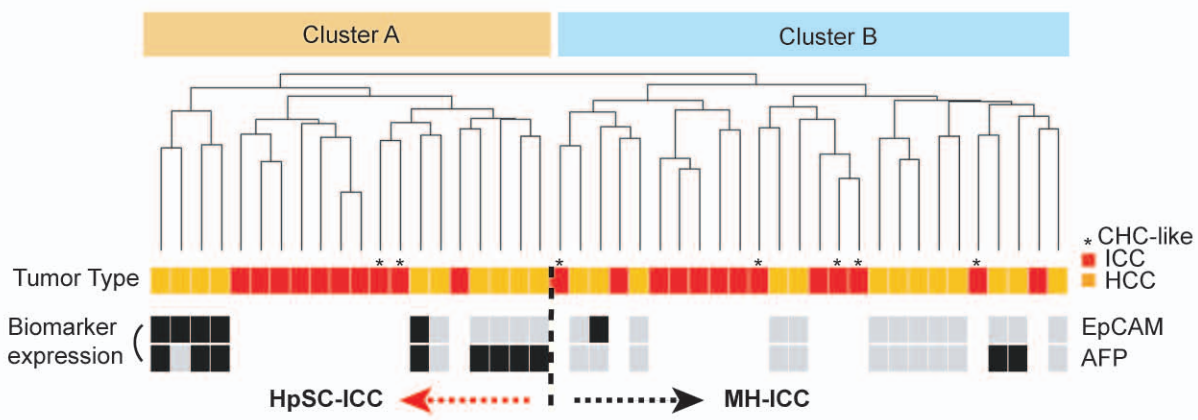

B

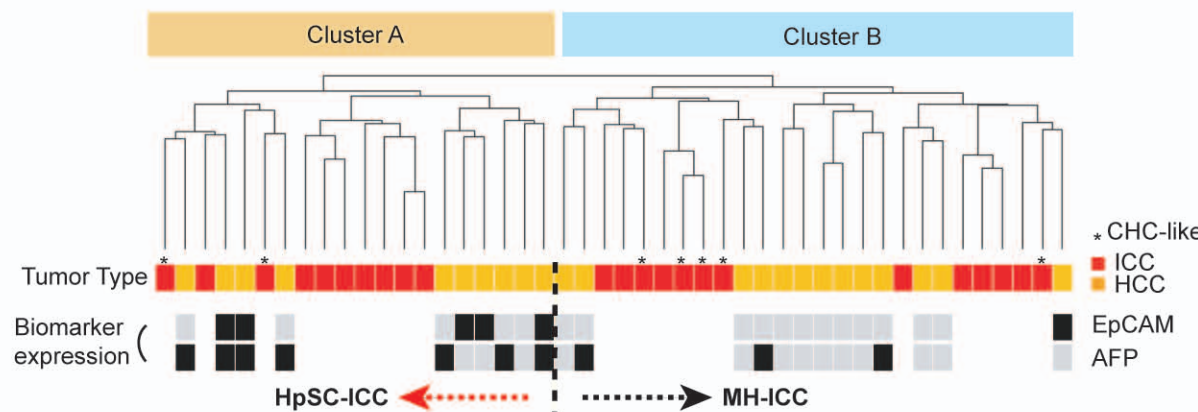

C

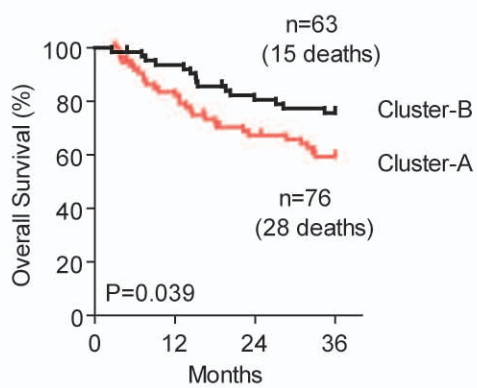

Figure S3

A

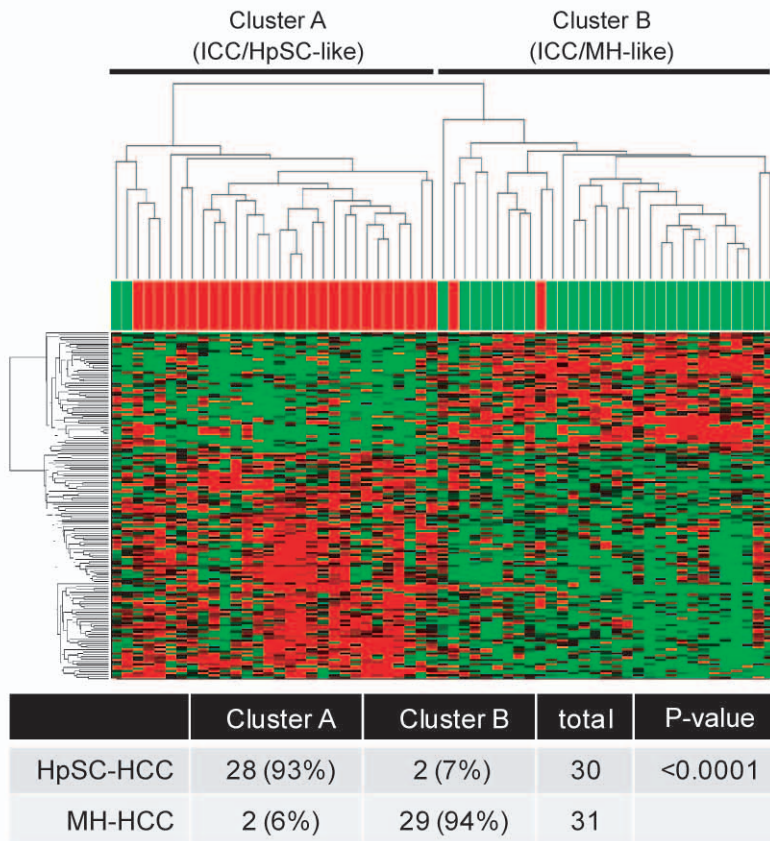

B

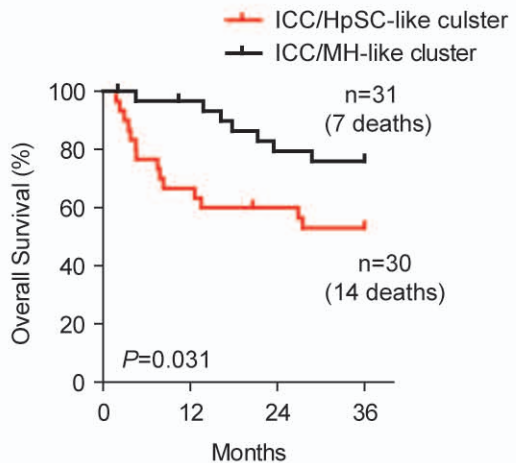

Figure S4

A

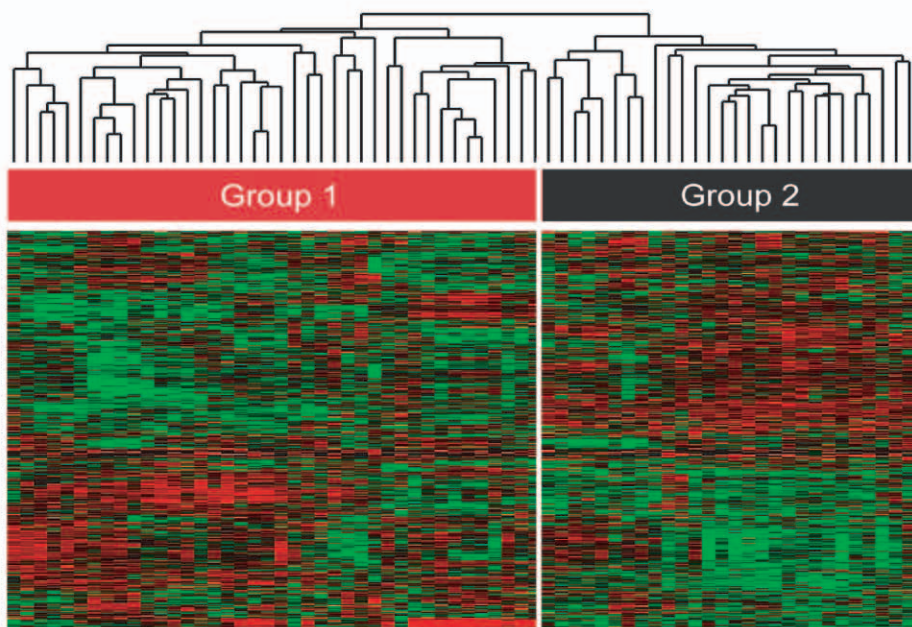

B

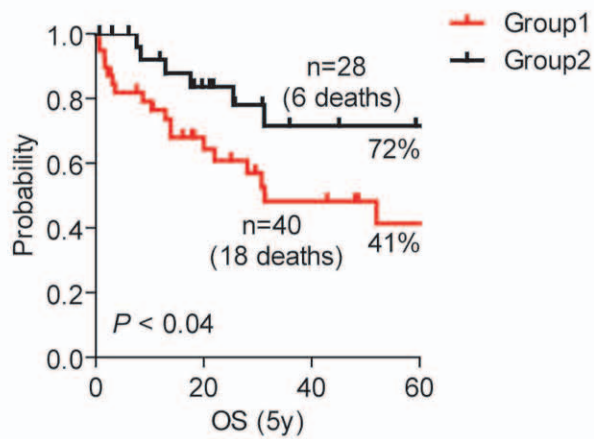



A

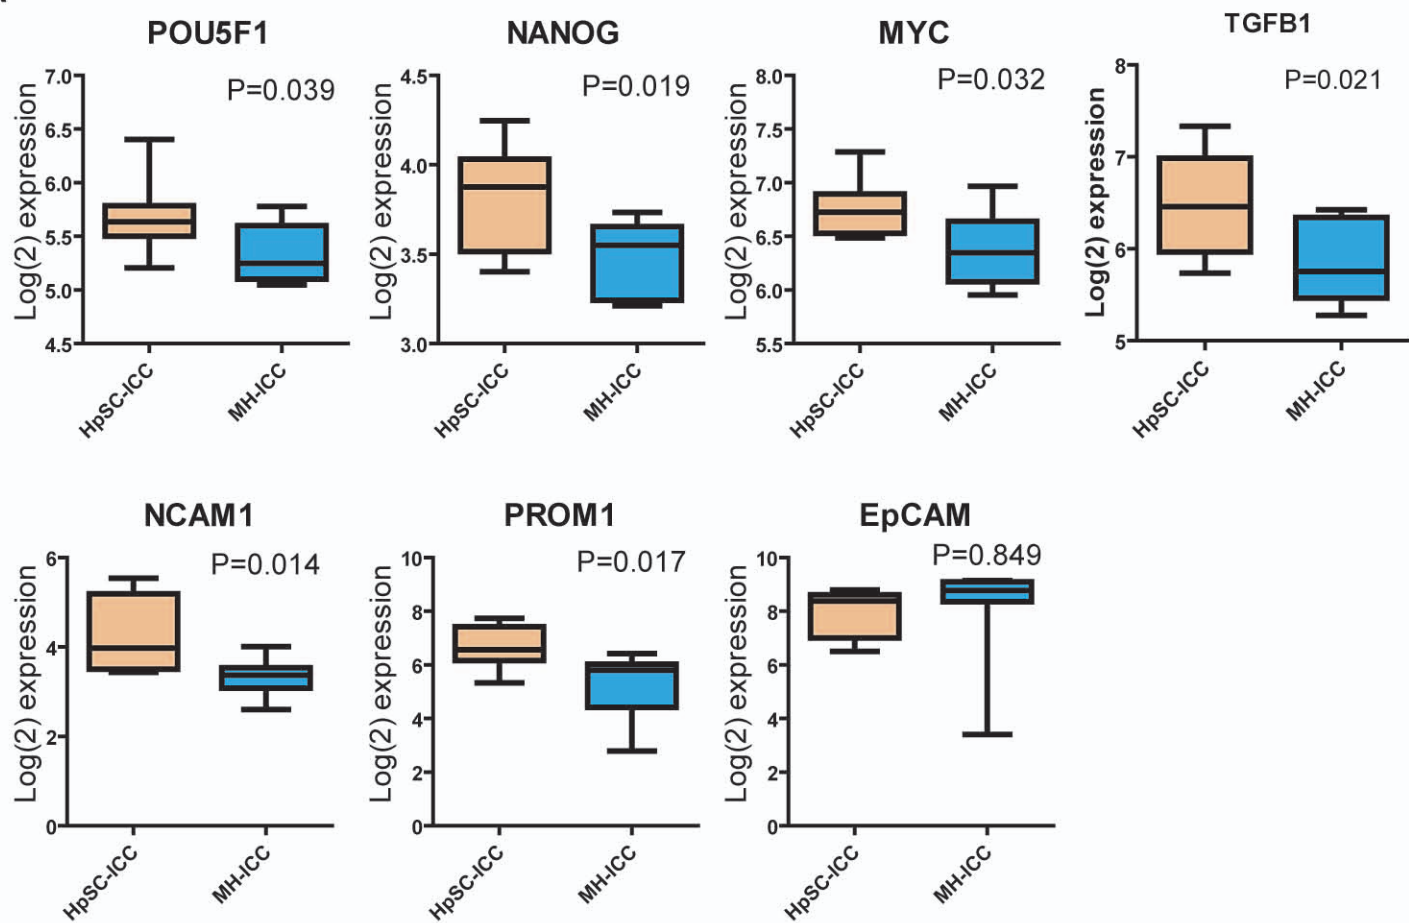

B

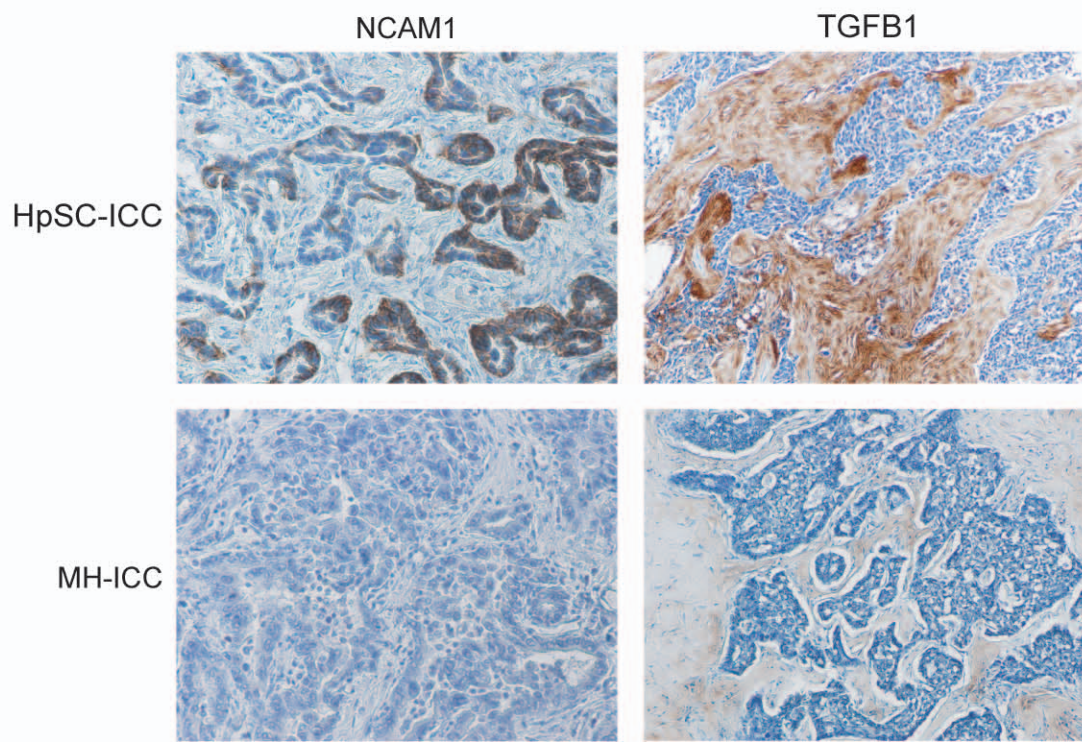

Figure S6

A

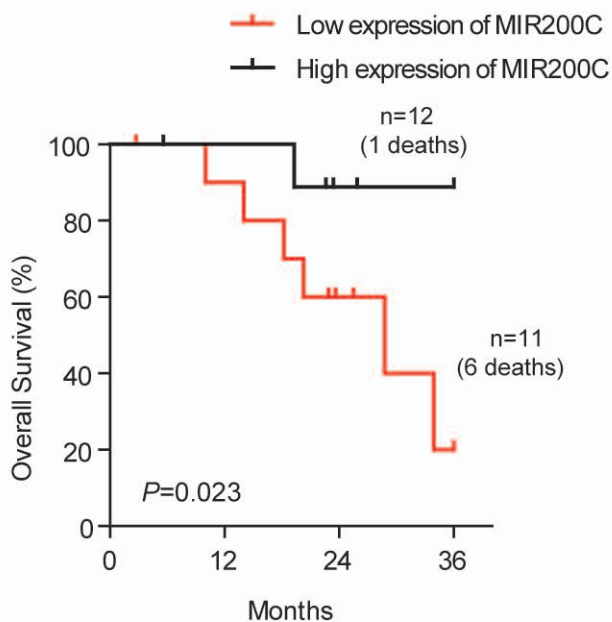

B

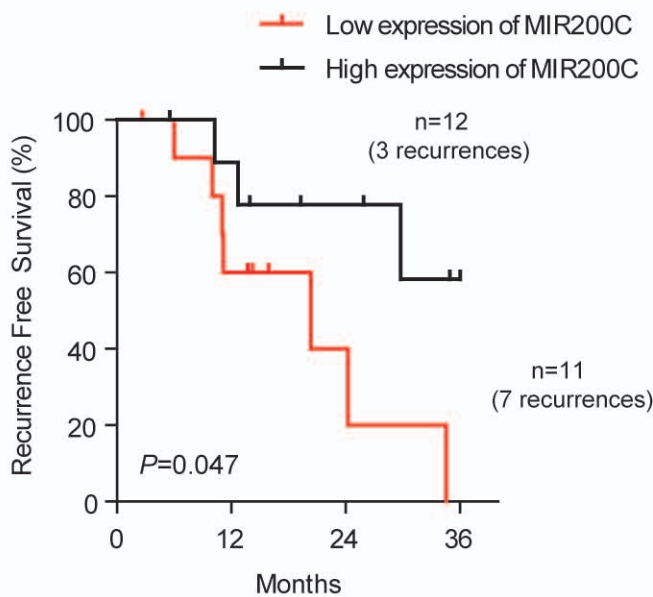

Figure S7

A

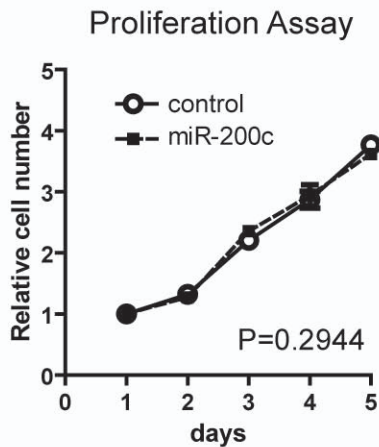

B

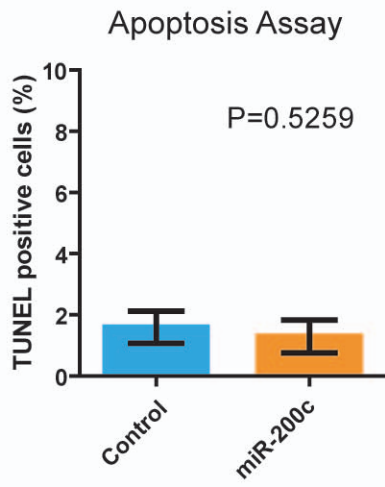

Figure S8

A

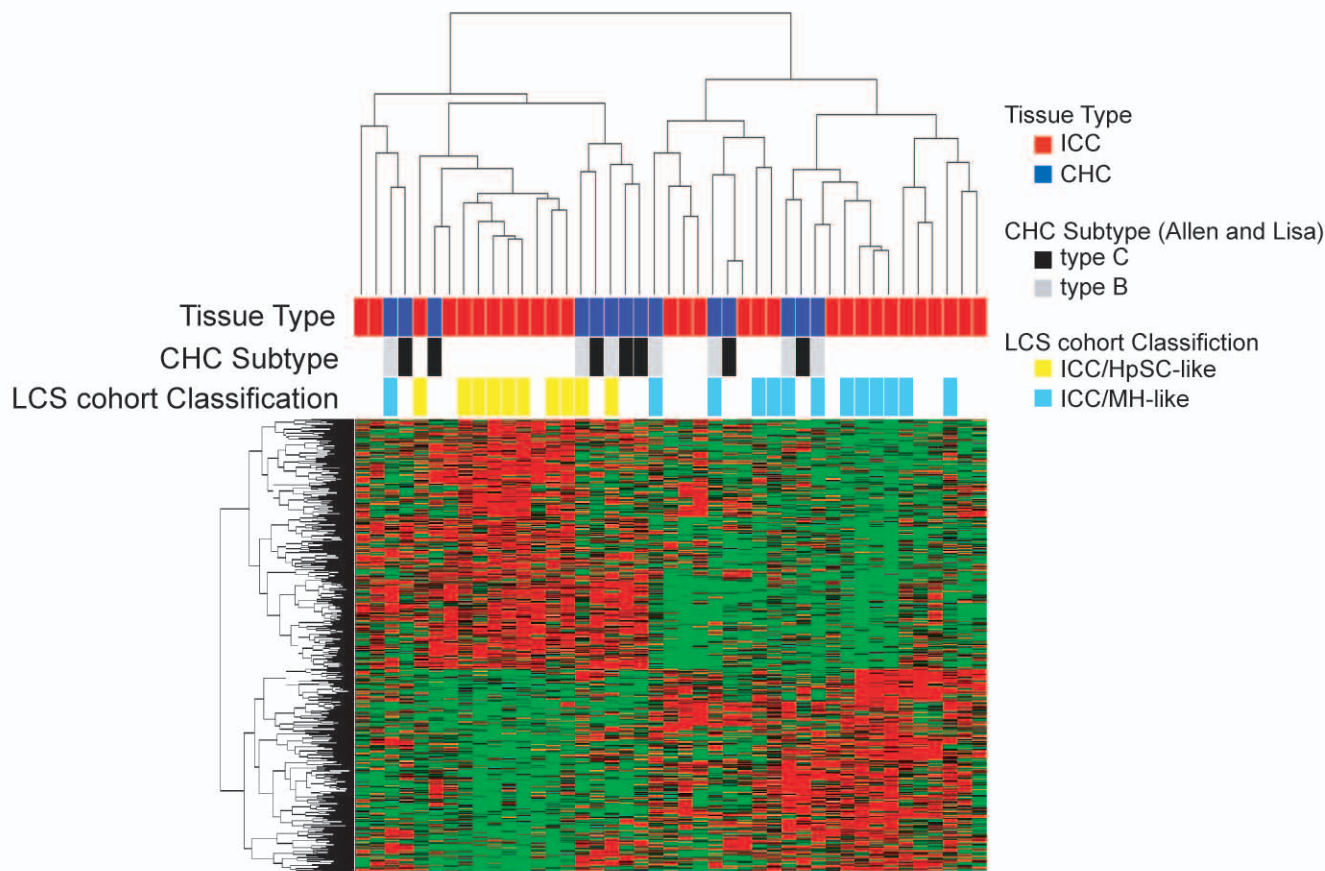

B

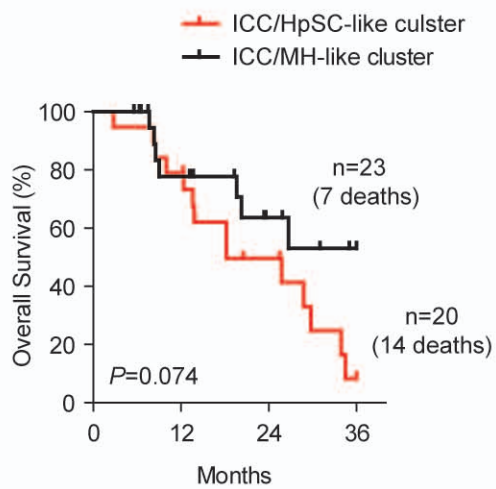

Supplement: NIHMS384343-supplement-Supp_Fig_S1-S8.pdf [file NIHMS384343-supplement-Supp_Fig_S1-S8.pdf]
